# Supplementary material for: Ferroptosis regulators related scoring system by Gaussian finite mixture model to predict prognosis and immunotherapy efficacy in nasopharyngeal carcinoma
Source: Front Genet. 2022 Sep 2;13:975190. doi: 10.3389/fgene.2022.975190 (PMC9479336; doi:10.3389/fgene.2022.975190)
Supplement: Supplementary file 1 [file Table1.xlsx]

## Sheet: S1
Table-S1: Basic information of datasets included in this study downloaded from GEO.
GEO Series	GEO Platform	Sample Type	Total	Region	Publication
GSE34573	GPL570	4normal+16NPC	20	UK	2011
GSE12452	GPL570	10normal+31NPC	41	USA	2008
GSE53819	GPL6480	18normal+18NPC	36	China	2014
GSE64634	GPL570	4normal+12NPC	16	China	2017
GSE68799	GPL11154	4normal+42NPC	46	China	2016
GSE102349	GPL11154	113NPC	113	USA	2017

## Sheet: S2
Table-S2: The list of ferroptosis regulators involved in this study.
Symbol	type	Confidence
ACSL3,AIFM2,AKR1C1,AKR1C2,AKR1C3,ARNTL,ATF4,BRD4,CA9,CAV1,CBS,CD44,CDKN1A,CHMP5,CHMP6,CISD1,CISD2,FADS2,FH,GCH1,GPX4,HELLS,HIF1A,HSF1,HSPA5,HSPB1,ISCU,LAMP2,MT1G,MUC1,NF2,NFE2L2,NFS1,NQO1,OTUB1,PML,PRDX6,PROM2,RB1,SCD,SESN2,SLC40A1,SLC7A11,SQSTM1,SRC,STAT3,TMBIM4,TP63,ZFP36	suppressor	Validated
CHAC1,FTH1,PTGS2	marker	Validated
ABCC1,ACSF2,ACSL4,ACVR1B,ALOX12,ALOX12B,ALOX15,ALOX15B,ALOX5,ALOXE3,ANO6,ATF3,ATG5,ATG7,ATM,ATP5G3,BAP1,BECN1,CARS,CDKN2A,CDO1,CS,DPP4,EGFR,EGLN2,ELAVL1,EMC2,G6PD,GOT1,HMGB1,HMOX1,IDH1,IFNG,IREB2,KEAP1,LONP1,MAPK1,MAPK3,MIOX,MTDH,MYB,NCOA4,NOX4,PANX1,PEBP1,PGD,PHKG2,PRKAA1,PRKAA2,RPL8,SAT1,SLC1A5,SOCS1,TAZ,TF,TGFBR1,TNFAIP3,TP53,VDAC2,YY1AP1,ZEB1	driver	Validated

## Sheet: S3
Table-S3: The gene sets used in this work for estimating the enrichment score in biological process activity.
Gene Signature	Genes
CD8_T_effector	CD8A,CXCL10,CXCL9,GZMA,GZMB,IFNG,PRF1,TBX21
DNA_damage_repair	ALKBH2,ALKBH3,APEX1,APEX2,APLF,ATM,ATR,ATRIP,BLM,BRCA1,BRCA2,BRIP1,CCNH,CDK7,CETN2,CHAF1A,CHEK1,CHEK2,CLK2,DCLRE1C,DDB1,DDB2,DUT,ENDOV,ERCC1,ERCC2,ERCC3,ERCC4,ERCC5,ERCC6,ERCC8,FAN1,FANCA,FANCB,FANCC,FANCD2,FANCE,FANCF,FANCG,FANCL,FANCM,GTF2H1,GTF2H2,GTF2H3,GTF2H4,GTF2H5,H2AFX,HLTF,HUS1,LIG1,LIG3,LIG4,MBD4,MDC1,MGMT,MLH1,MLH3,MMS19,MNAT1,MPG,MSH2,MSH3,MSH4,MSH5,MSH6,MUTYH,NEIL1,NEIL2,NEIL3,NHEJ1,…
Pan-F-TBRS	ACTA2,ACTG2,ADAM12,ADAM19,CNN1,COL4A1,CTGF,CTPS1,FAM101B,FSTL3,HSPB1,IGFBP3,PXDC1,SEMA7A,SH3PXD2A,TAGLN,TGFBI,TNS1,TPM1
Antigen_processing_machinery	B2M,HLA-A,HLA-B,HLA-C,TAP1,TAP2
Immune_checkpoint	CD274,CTLA4,HAVCR2,LAG3,PDCD1,PDCD1LG2,TIGIT
EMT_(1)	CLDN3,CLDN7,CLDN4,CDH1,VIM,TWIST1,ZEB1,ZEB2
FGFR3-related_genees	FGFR3,TP63,WNT7B
KEGG_discovered_histones	HIST1H2AG,HIST1H2AI,HIST1H2BL,HIST2H2BF
Angiogenesis	CDH5,SOX17,SOX18,TEK
Fanconi_anemia	APITD1,ATR,ATRIP,BLM,BRCA1,BRCA2,BRIP1,C17orf70,C19orf40,EME1,EME2,ERCC1,ERCC4,FAN1,FANCA,FANCB,FANCC,FANCD2,FANCE,FANCF,FANCG,FANCI,FANCL,FANCM,HES1,MLH1,MUS81,PALB2,PMS2,POLH,POLI,POLK,POLN,RAD51,RAD51C,REV1,REV3L,RMI1,RMI2,RPA1,RPA2,RPA3,RPA4,SLX4,STRA13,TELO2,TOP3A,TOP3B,UBE2T,USP1,WDR48
Cell_cycle	ABL1,ANAPC1,ANAPC10,ANAPC11,ANAPC13,ANAPC2,ANAPC4,ANAPC5,ANAPC7,ATM,ATR,BUB1,BUB1B,BUB3,CCNA1,CCNA2,CCNB1,CCNB2,CCNB3,CCND1,CCND2,CCND3,CCNE1,CCNE2,CCNH,CDC14A,CDC14B,CDC16,CDC20,CDC23,CDC25A,CDC25B,CDC25C,CDC26,CDC27,CDC45,CDC6,CDC7,CDK1,CDK2,CDK4,CDK6,CDK7,CDKN1A,CDKN1B,CDKN1C,CDKN2A,CDKN2B,CDKN2C,CDKN2D,CHEK1,CHEK2,CREBBP,CUL1,DBF4,E2F1,E2F2,E2F3,E2F4,E2F5,EP300,ESPL1,FZR1,GADD45A,GADD45B,GADD…
DNA_replication	DNA2,FEN1,LIG1,MCM2,MCM3,MCM4,MCM5,MCM6,MCM7,PCNA,POLA1,POLA2,POLD1,POLD2,POLD3,POLD4,POLE,POLE2,POLE3,POLE4,PRIM1,PRIM2,RFC1,RFC2,RFC3,RFC4,RFC5,RNASEH1,RNASEH2A,RNASEH2B,RNASEH2C,RPA1,RPA2,RPA3,RPA4,SSBP1
Nucleotide_excision_repair	CCNH,CDK7,CETN2,CUL4A,CUL4B,DDB1,DDB2,ERCC1,ERCC2,ERCC3,ERCC4,ERCC5,ERCC6,ERCC8,GTF2H1,GTF2H2,GTF2H3,GTF2H4,GTF2H5,LIG1,MNAT1,PCNA,POLD1,POLD2,POLD3,POLD4,POLE,POLE2,POLE3,POLE4,RAD23A,RAD23B,RBX1,RFC1,RFC2,RFC3,RFC4,RFC5,RPA1,RPA2,RPA3,RPA4,XPA,XPC
Homologous_recombination	BLM,BRCA2,EME1,MRE11A,MUS81,NBN,POLD1,POLD2,POLD3,POLD4,RAD50,RAD51,RAD51B,RAD51C,RAD51D,RAD52,RAD54B,RAD54L,RPA1,RPA2,RPA3,RPA4,SHFM1,SSBP1,TOP3A,TOP3B,XRCC2,XRCC3
Mismatch_repair	EXO1,LIG1,MLH1,MLH3,MSH2,MSH3,MSH6,PCNA,PMS2,POLD1,POLD2,POLD3,POLD4,RFC1,RFC2,RFC3,RFC4,RFC5,RPA1,RPA2,RPA3,RPA4,SSBP1
EMT2	AXL,FAP,LOXL2,ROR2,TAGLN,TWIST2,WNT5A
WNT_target	EFNB3,MYC,TCF12,VEGFA
EMT3	FOXF1,GATA6,SOX9,TWIST1,ZEB1,ZEB2
Cell_cycle_regulators	ATM,CCND1,CCNE1,CDKN1A,CDKN2A,E2F3,FBXW7,MDM2,RB1,TP53

## Sheet: S4
Table-S4: The immune cell signature used in this work for estimating the relative abundance of immune cell infiltration
CellType	Gene_Symbol
Activated.B.cell	ADAM28,CD180,CD79B,BLK,CD19,MS4A1,TNFRSF17,IGHM,GNG7,MICAL3,SPIB,HLA-DOB,IGKC,PNOC,FCRL2,BACH2,CR2,TCL1A,AKNA,ARHGAP25,CCL21,CD27,CD38,CLEC17A,CLEC9A,CLECL1
Activated.CD4.T.cell	AIM2,BIRC3,BRIP1,CCL20,CCL4,CCL5,CCNB1,CCR7,DUSP2,ESCO2,ETS1,EXO1,EXOC6,IARS,ITK,KIF11,KNTC1,NUF2,PRC1,PSAT1,RGS1,RTKN2,SAMSN1,SELL,TRAT1
Activated.CD8.T.cell	ADRM1,AHSA1,C1GALT1C1,CCT6B,CD37,CD3D,CD3E,CD3G,CD69,CD8A,CETN3,CSE1L,GEMIN6,GNLY,GPT2,GZMA,GZMH,GZMK,IL2RB,LCK,MPZL1,NKG7,PIK3IP1,PTRH2,TIMM13,ZAP70
Gamma.delta.T.cell	ACP5,AQP9,BTN3A2,C1orf54,CARD8,CCL18,CD209,CD33,CD36,CDK5,IL10RB,KLRF1,LGALS1,MAPK7,KLHL7,KRT80,LAMC1,LCORL,LMNB1,MEIS3P1,MPL,FABP1,FABP5,FADD,MFAP3L,MINPP1,RPS24,RPS7,RPS9,DBNL,CCL13
Immature..B.cell	CD22,CYBB,FAM129C,FCRL1,FCRL3,FCRL5,FCRLA,HDAC9,HLA-DQA1,HVCN1,KIAA0226,NCF1,NCF1B,P2RY10,SP100,TXNIP,STAP1,TAGAP,ZCCHC2
Regulatory.T.cell	CCL3L1,CD72,CLEC5A,FOXP3,ITGA4,L1CAM,LIPA,LRP1,LRRC42,MARCO,MMP12,MNDA,MRC1,MS4A6A,PELO,PLEK,PRSS23,PTGIR,ST8SIA4,STAB1
T.follicular.helper.cell	B3GAT1,CDK5R1,PDCD1,BCL6,CD200,CD83,CD84,FGF2,GPR18,CEBPA,CECR1,CLEC10A,CLEC4A,CSF1R,CTSS,DMN,DPP4,LRRC32,MC5R,MICA,NCAM1,NCR2,NRP1,PDCD1LG2,PDCD6,PRDX1,RAE1,RAET1E,SIGLEC7,SIGLEC9,TYRO3,CHST12,CLIC3,IVNS1ABP,KIR2DL2,LGMN
Type.1.T.helper.cell	CD70,TBX21,ADAM8,AHCYL2,ALCAM,B3GALNT1,BBS12,BST1,CD151,CD47,CD48,CD52,CD53,CD59,CD6,CD68,CD7,CD96,CFHR3,CHRM3,CLEC7A,COL23A1,COL4A4,COL5A3,DAB1,DLEU7,DOC2B,EMP1,F12,FURIN,GAB3,GATM,GFPT2,GPR25,GREM2,HAVCR1,HSD11B1,HUNK,IGF2,RCSD1,RYR1,SAV1,SELE,SELP,SH3KBP1,SIT1,SLC35B3,SIGLEC10,SKAP1,THUMPD2,TIGIT,ZEB2,ENC1,FAM134B,FBXO30,FCGR2C,STAC,LTC4S,MAN1B1,MDH1,MMD,RGS16,IL12A,P2RX5,CD97,ITGB4,ICAM3,METR…
Type.17.T.helper.cell	IL17A,IL17RA,C2CD4A,C2CD4B,CA2,CCDC65,CEACAM3,IL17C,IL17F,IL17RC,IL17RE,IL23A,ILDR1,LONRF3,SH2D6,TNIP2,ABCA1,ABCB1,ADAMTS12,ANK1,ANKRD22,B3GALT2,CAMTA1,CCR9,CD40,GPR44,IFT80
Type.2.T.helper.cell	ASB2,CSRP2,DAPK1,DLC1,DNAJC12,DUSP6,GNAI1,LAMP3,NRP2,OSBPL1A,PDE4B,PHLDA1,PLA2G4A,RAB27B,RBMS3,RNF125,TMPRSS3,GATA3,BIRC5,CDC25C,CDC7,CENPF,CXCR6,DHFR,EVI5,GSTA4,HELLS,IL26,LAIR2
Activated.dendritic.cell	ABCD1,C1QC,CAPG,CCL3L3,CD207,CD302,ATP5B,ATP5L,ATP6V1A,BCL2L1,C1QB,SNURF,SPCS3,CCNA1,CEACAM8,NOS2,SRA1,TNFRSF6B,TREM1,TREML1,RHOA,SLC25A37,TNFSF14,TREML4,VNN2,XPO6,CLEC4C,TNFAIP2,UBD,ACTR3,RAB1A,SLA,HLA-DQA2,SIGLEC5,SLAMF9
CD56bright.natural.killer.cell	ABAT,C11orf75,C5orf15,CDHR1,DCAF12,DYNLL1,GPR137B,HCP5,HDGFRP2,KRT86,MLST8,ELMOD3,ENTPD5,FAM119A,FAM179A,CLIC2,COX7A2L,CREB3L4,CSF1,CSNK2A2,CSTA,CSTB,CTPS,CTSD,FST,GATA2,GMPR,HDC,HEY1,HOXA1,HS2ST1,HS3ST1,BCL11B,CDH3,MYL6B,NAA16,ClQA,ClQB,CYP27B1,EIF3M
CD56dim.natural.killer.cell	CYP27A1,DDX55,DYRK2,RPL37A,NOTCH3,AKR7A3,GPRC5C,GRIN1,HLA-E,PORCN,PSMC4,UPP1,IL21R,KIR2DS1,KIR2DS2,KIR2DS5
Eosinophil	GIPR,KRT18P50,LRMP,FOSB,RRP12,GPR183,NR4A3,ST3GAL6,DEPDC5,PDE6C,PKD2L2,GPR65,IL5RA,P2RY14,DACH1,DAPK2,EMR3
Immature.dendritic.cell	ACADM,AHCYL1,ALDH1A2,ALDH3A2,ALDH9A1,ALOX15,AMT,ARL1,ATIC,ATP5A1,CAPZA1,LILRA5,RDX,RRAGD,TACSTD2,INPP5F,RAB38,PLAU,CSF3R,SLC18A2,AMPD2,CLTB,C1orf162
Macrophage	AIF1,CCL1,CCL14,CCL23,CCL26,CD300LB,CNR1,CNR2,EIF1,EIF4A1,FPR1,FPR2,FRAT2,GPR27,GPR77,RNASE2,MS4A2,BASP1,IGSF6,HK3,VNN1,FES,NPL,FZD2,FAM198B,HNMT,SLC15A3,CD4,TXNDC3,FRMD4A,CRYBB1,HRH1,WNT5B
Mast.cell	ADAMTS3,CPA3,CMA1,CTSG,ARHGAP15,CPM,FCN1,FTL,HSPA6,ITGA9,RNASE3,S100A4,SIGLEC8,SLC6A4,PTGS2,EGR3,PILRA
MDSC	CCR2,CD14,CD2,CD86,CXCR4,FCGR2A,FCGR2B,FCGR3A,FERMT3,GPSM3,IL18BP,IL4R,ITGAL,ITGAM,PARVG,PSAP,PTGER2,PTGES2,S100A8,S100A9
Monocyte	ASGR2,CFP,ASGR1,CD1D,UPK3A,ACTG1,ANXA5,ATP6V1B2,CFL1,DAZAP2,CTBS,EMR4P,HIVEP2,MARCKSL1,MBP,MMP15,PNPLA6,TMBIM6,PQBP1,TEX264,IKZF1
Natural.killer.cell	AKT3,AXL,BST2,CDH2,CRTAM,CSF2RA,CTSZ,CXCL1,CYTH1,DAXX,DGKH,DLL4,DPYD,ERBB3,F11R,FAM27A,FAM49A,FASLG,FCGR1A,FN1,FSTL1,FUCA1,GBP3,GLS2,GRB2,LST1,BCL2,CDC5L,FGF18,FUT5,FZR1,GAGE2,IGFBP5,KANK2,LDB3
Natural.killer.T.cell	BTN2A2,CD101,CD109,CNPY3,CNPY4,CREB1,CRTC2,CRTC3,CSF2,KLRC1,FUT4,ICAM2,IL32,LAMP2,LILRB5,KLRG1,HSPA4,HSPB6,ISM2,ITIH2,KDM4C,KIR2DS4,KIRREL3,SDCBP,NFATC2IP,MICB,KIR2DL1,KIR2DL3,KIR3DL1,KIR3DL2,NCR1,FOSL1,TSLP,SLC7A7,SPP1,TREM2,UBASH3A,YBX2,CCDC88A,CLEC1A,THBD,PDPN,VCAM1,EMR1
Neutrophil	CREB5,CDA,CHST15,S100A12,APOBEC3A,CASP5,MMP25,HAL,C1orf183,FFAR2,MAK,CXCR1,STEAP4,MGAM,BTNL8,CXCR2,TNFRSF10C,VNN3
Plasmacytoid.dendritic.cell	CBX6,DAB2,DDX17,HIGD1A,IDH3A,IL3RA,MAGED1,NUCB2,OFD1,OGT,PDIA4,SERTAD2,SIRPA,TMED2,ENG,FCAR,IGF1,ITGA2B,GABARAP,GPX1,KRT23,PROK2,RALB,RETNLB,RNF141,SEC14L1,SEPX1,EMP3,CD300LF,ABTB1,KLHL21,PHRF1

## Sheet: S5
Table.S5: The EBV gene signature used in this work for estimating the relative expression of EBV gene.
EBV gene	EBV Gene Signature
RPMS1	BTG3,RNF165,KIAA1653,UNQ6494,PXT1,SOCS1,C6orf141,AK095721,KREMEN2,ATF5,DLG5,AX747179,PSPH,AK127339,MICALL2,C18orf23,DQX1,LOC286059,FERMT1,GJB5,DMD,GALNT11,FRMD4A,GJB3,LOC284454,GORAB,PRODH,PKDCC,RWDD2B,PLCH2,TNFRSF10B,LOC100507053,ZNF738,COL27A1,THBS4,LOC100996485,HDGFRP3,AK124682,RAET1K,MAPKBP1,POMGNT1,LOC100129148,MYO19,PCNA,KDM4A.AS1,WRAP73,SYNPO2,LOC100506472,VRK2,LHX2,PHLDA3,LINC00173,COA1,P…
RPMS1	,TNFAIP3,C1orf213,SRSF2,IRS2,E2F1,NEURL3,GPR143,ABCC4,FAM57A,UQCC,PARP12,PGAP1,IKBKE,PAQR4,LOC100506548,C12orf65,BC034020,MATN4,AMOTL1,BX538249,ITGAM,GNPDA1,MMAA,CTNND1,MLF1IP,TK1,POGLUT1,MTG2,BCAT2,ZDBF2,EMX1,AX746605,DQ574852,ERO1LB,TRMU,RBM19,EPHB2,HCAR3,ST6GALNAC2,SRD5A1,DUT,GPSM2,LOC100505876,SNRPD1,POU5F1,AGRN,SPATS2,RFX5,RFC4,ARMC12,RMI2,OVOS2,C16orf95,AX747706,DCST2,TUBA1C,KIAA0146,ANXA8,…
RPMS1	EGFR,FOXK1,FAH,PRPF40B,MAN2C1,DSCAM,OGFRL1,ZNF337,STC2,HYPK,TANK,PPP2R2C,AK022993,GBP1P1,ESRRB,NPNT,MYO6,LRP5L,FAM83H,HNRNPU.AS1,ZNF37BP,FGF2,ATG4D,LIX1,ABTB2,LOC100128361,COL19A1,ARL14,RAI14,SLC25A3,UNC119,DQ570096,SKA1,C17orf99,C12orf29,CYP3A7,MCM3AP.AS1,BC094873,ATXN2L,ADAMTS17,MTG1,ICAM5,CCDC150,PVRL1,TIA1,MED30,HERC2,MIS18A,KIAA0907,ADTRP,SCUBE1,PGLYRP4,DRAM1,ORC6,C18orf21,NTF4,SORD,PPM1F,TR…
RPMS1	MOB3B,DIABLO,CCNJL,SERF1A,TCF20,PGAM5,HOXA4,PTPRG.AS1,FASLG,MBTPS2,PDRG1,CDK1,AK090604,AK126635,SPATA41,SLC25A22,POLG2,NAPB,SHANK3,DUSP14,HERC2P9,FIZ1,GZMA,ATXN10,AK000154,ATP11C,RBX1,ZSCAN25,ANKRD46,CCNL2,POLQ,TTI1,VWCE,LOC100133091,FAM117A,RDM1,COPS8,DNAJA3,PDLIM4,TBC1D3,TICRR,ANKRD65,MRPS27,CXCL3,OXER1,AGPAT3,C8orf76,TFB2M,AK097866,IFNGR2,RTKN,BX537811,EIF1,SNN,POGZ,DHRS13,ZNF774,ATIC,GSTCD,AA…
LMP2B	KREMEN2,BLVRA,CD274,WSCD1,ABHD17C,UBD,CXCL10,PYCARD,ISYNA1,ITGAM,FUNDC1,NFKB2,DLG5,GADD45A,LAMA3,USP18,RELB,TYMP,C16orf95,MYO3A,AP3B2,GJB3,RNF207,KEL,AX747179,COL27A1,NINJ1,RNF165,LGALS9,XAF1,UNQ6494,DRGX,RWDD2B,CXCL11,CCL4,GRHPR,HAPLN3,AJUBA,OASL,PTGIR,NXN,LAG3,INPP1,ZNF385A,SOCS1,PHF21B,FAS,BIRC3,NFKBIE,COA1,PLGRKT,IFIH1,BCL3,BAHD1,PTGES,MICALL2,FAM95B1,THBS4,VANGL2,HRSP12,HOXC6,DKFZp686M11215,…
LMP1	KEL,BLVRA,NFKBIE,CD274,BIRC3,POGLUT1,SFTPA1,SELM,ICAM1,NINJ1,CCL4,SERPINF2,ACHE,MAF,CHST2,SBNO2,CD40,IFNGR2,ARL14,NFKB2,PTGIR,TENM2,ADAM8,MMP28,CHRNA7,LAG3,NKG7,DRGX,HRIHFB2017,FAS,HCK,WSCD1,SFTPA2,APOBEC3H,HAPLN3,ANKRD24,IFNG,SNN,CLEC7A,GRHPR,FUNDC1,HMSD,EMX1,NPHS1,LRRC16B,RELB,SLC2A6,ZNF846,TYMP,GZMB,PLGRKT,CCL5,FAM173A,JAK2,FASLG,MSC,LAMA3,GADD45A,TMEM150B,GNLY,IL18R1,CSF2RB,UPB1,TLR5,NXN,LOC4…
EBNA1	DTL,LMNB2,AKT1S1,EXO1,POLD1,PRC1,SLC5A6,KIF14,TICRR,CBX2,CHAF1A,CENPF,CAD,STK11,INTS7,CDK18,GINS1,TCF19,EME1,ASPM,TONSL,CENPO,CDC25A,MYO19,C17orf53,AGAP3,GJB3,IPO9,NCAPG2,KIF4A,KIF18B,SLC25A22,FBXL18,COLGALT1,E2F1,ZNF282,RBM14,TAF5L,IQGAP3,NOL10,URB2,AARS2,KIF15,RAD23A,NUCKS1,SPC24,SMYD5,PCNA,FERMT1,MELK,ASF1B,UCK2,DLX4,TPX2,DOHH,HNRNPA2B1,WHSC1,C1orf112,BRCA1,MCM10,RCCD1,KIF23,RRM2,YWHAG,TMPO.AS…
EBNA1	,KPTN,GTSE1,BOLA3,FAM72D,ARHGAP8,AURKB,TFAP2A,SLC25A44,GPR137,SCAMP3,EIF2AK1,NUP133,SAMD4B,ESRRB,IRF6,MCM3,FEN1,PKM,SENP3.EIF4A1,POLD2,HOMER3,SMARCA4,DIAPH3,DNMT3A,CCT4,PCNT,ELOVL7,GNPDA1,TFB2M,MTMR4,FSCN1,DCLRE1B,GGCT,HNRNPM,SSTR2,NCAPD3,IFNGR2,C1orf35,ESPL1,DDA1,MRPL24,ZC3H4,OLA1,CCNA2,GLRX2,RBM10,TROAP,HNRNPAB,CYCS,HOTAIR,LIN9,TP53,RAD51,GOSR1,MRPL35,RPE,DARS2,PIP5K1C,NCLN,,CD276,FBXO22,TP53BP…
EBNA1	MIF,ZKSCAN5,EZH2,EPT1,TAF1A,LOC642852,PKNOX1,ANKLE2,MTG2,G3BP1,HIP1,PRICKLE3,LETM1,TRAIP,LUC7L2,NHSL1,CHST14,ALDH16A1,PRKAR1B,TTL,SIX5,ZNF697,FARSB,PFKL,RAP2B,ATXN7L3,TRMT61B,SAPCD2,BAHCC1,C1orf43,FAM83B,NR2C2AP,FAM222B,SNRPB,ZNF207,U2AF1,ARHGEF11,RABIF,ATP5J2,ADIPOR1,FAM83H,CDKN2AIPNL,GYS1,PDSS1,SCAF4,KLRG2,HMG20B,WBSCR16,ZNF607,RBFA,KBTBD2,FAM57A,SLC22A20,ATXN2L,LARS,ZNF512,XPO5,FASN,NSL1,PXMP2…
EBNA1	VPS72,UBE2Q1,POLR2E,C4orf21,PDZD11,GNLY,UPF3B,NRARP,SPHK2,LOC284454,AGAP2.AS1,CERS2,PMS1,MYO3A,DVL3,ARHGAP11B,MED26,UGGT1,ATP5I,ZFP41,NUP37,EIF5B,TSPAN14,POLE2,YKT6,SEPHS1,SRCRB4D,ALYREF,ECE2,CHD3,NUP85,MED14,GZF1,IQCE,DNMT3B,SLC35B4,MSTO1,RAB13,RNF114,SLC25A40,SNX12,DLD,CCL8,PHLDA3,EHMT2,TTC23,ZNF260,CD3EAP,ZBTB12,ZNF775,FAM220A,YBX1,SERBP1,SNRPF,U2SURP,TNFAIP3,R3HDM1,PLCXD1,BC096759,EXOSC2,RBMS…
A73	DQX1,UNQ6494,BTG3,PXT1,UBD,SOCS1,MRPL45P2,PYCARD,KIAA1653,ATF5,C6orf141,RWDD2B,ZNF738,C18orf23,C16orf98,LOC100506472,RNF165,CENPH,LOC100996485,KREMEN2,LINC00173,RNF43,TRIAP1,WRAP73,LOC100507053,GAMT,LSM2,PKDCC,AK095721,LYPLAL1,SRSF6,JMJD4,PHLDA3,FOXRED2,BC035067,GALNT11,MTERFD1,DMD,TBC1D17,LOC100129148,CDKN2AIPNL,RRP7B,FOXQ1,FRMD4A,TSPAN17,SNORA33,COL22A1,AX747179,TP53TG1,PSPH,LOC286059,RHBDL1,PC…
A73	ALKBH2,DUT,CCNG1,UNC119,SNHG8,RHCE,SNHG6,CCNF,DKFZp686N1150,DLX4,FAM195A,AX747819,MAPKBP1,FASTKD1,AK054635,RBFA,STAR,EPB41L4A,WDR47,IDH1,FAM86HP,EME1,AHCY,MRPL34,PIM3,MFF,KRT32,PSMC3IP,THOC1,MRPL38,TARBP2,SNHG15,NELFE,LINC00634,XG,NIT2,ZNRF1,NUP35,NTRK2,RNASEH2A,NUP37,ATG4B,COX6B2,SUV39H2,SIM1,ZNF692,ST20,CYP3A7,HCAR3,STRADA,CDH23,SSTR2,ANAPC7,RFC4,MTG1,RQCD1,EFS,POLL,GBAP1,OLA1,SCD5,RPLP0,AX7474…

## Sheet: S6
Table-S6: The correlation analysis among ferroptosis genes and immune cells
Gene	Immune cells	Cor	P - value	Significance
ALOX12B	Activated B cell	-0.00825586	0.930841
ALOX12B	Activated CD4 T cell	0.198073	0.0354645	*
ALOX12B	Activated CD8 T cell	0.206717	0.0280358	*
ALOX12B	Activated dendritic cell	0.12563	0.184881
ALOX12B	CD56bright natural killer cell	0.100559	0.289254
ALOX12B	CD56dim natural killer cell	0.184627	0.0502709
ALOX12B	Eosinophil	0.0156842	0.869037
ALOX12B	Gamma delta T cell	0.229266	0.0145793	*
ALOX12B	Immature B cell	0.0371151	0.696325
ALOX12B	Immature dendritic cell	0.0997631	0.293107
ALOX12B	Macrophage	-0.0349194	0.713482
ALOX12B	Mast cell	0.0657877	0.488744
ALOX12B	MDSC	0.181256	0.0546939
ALOX12B	Monocyte	0.039123	0.680767
ALOX12B	Natural killer cell	0.110569	0.243663
ALOX12B	Natural killer T cell	0.178969	0.0578734
ALOX12B	Neutrophil	0.21645	0.0212966	*
ALOX12B	Plasmacytoid dendritic cell	0.0916628	0.334249
ALOX12B	Regulatory T cell	0.174728	0.0641696
ALOX12B	T follicular helper cell	0.137475	0.146493
ALOX12B	Type 1 T helper cell	0.0608588	0.521953
ALOX12B	Type 17 T helper cell	0.312064	0.000765868	**
ALOX12B	Type 2 T helper cell	0.0462396	0.626734
HMGB1	Activated B cell	-0.0128994	0.892134
HMGB1	Activated CD4 T cell	0.0899665	0.343309
HMGB1	Activated CD8 T cell	-0.148624	0.116167
HMGB1	Activated dendritic cell	-0.169812	0.0721547
HMGB1	CD56bright natural killer cell	-0.173203	0.0665654
HMGB1	CD56dim natural killer cell	-0.190002	0.0438325	*
HMGB1	Eosinophil	-0.0433265	0.648634
HMGB1	Gamma delta T cell	-0.110507	0.24393
HMGB1	Immature B cell	-0.0314631	0.74078
HMGB1	Immature dendritic cell	-0.289505	0.00186993	**
HMGB1	Macrophage	-0.0828775	0.382823
HMGB1	Mast cell	-0.21003	0.0255624	*
HMGB1	MDSC	-0.182583	0.0529157
HMGB1	Monocyte	-0.000726729	0.993905
HMGB1	Natural killer cell	-0.163106	0.0843227
HMGB1	Natural killer T cell	-0.159855	0.0907837
HMGB1	Neutrophil	-0.248351	0.00799347	**
HMGB1	Plasmacytoid dendritic cell	-0.229132	0.0146385	*
HMGB1	Regulatory T cell	-0.185661	0.0489747	*
HMGB1	T follicular helper cell	-0.170425	0.0711181
HMGB1	Type 1 T helper cell	-0.17766	0.0597598
HMGB1	Type 17 T helper cell	-0.306207	0.000972239	**
HMGB1	Type 2 T helper cell	0.0612332	0.519391
NCOA4	Activated B cell	0.366755	6.45684e-05	**
NCOA4	Activated CD4 T cell	0.461716	2.64096e-07	**
NCOA4	Activated CD8 T cell	0.460794	2.80934e-07	**
NCOA4	Activated dendritic cell	0.514505	5.56035e-09	**
NCOA4	CD56bright natural killer cell	0.252152	0.0070539	**
NCOA4	CD56dim natural killer cell	0.239893	0.0104903	*
NCOA4	Eosinophil	0.40359	9.31155e-06	**
NCOA4	Gamma delta T cell	0.323775	0.000468358	**
NCOA4	Immature B cell	0.421112	3.40776e-06	**
NCOA4	Immature dendritic cell	0.389352	2.02339e-05	**
NCOA4	Macrophage	0.416832	4.37889e-06	**
NCOA4	Mast cell	0.483518	5.79969e-08	**
NCOA4	MDSC	0.484511	5.39912e-08	**
NCOA4	Monocyte	0.453805	4.46252e-07	**
NCOA4	Natural killer cell	0.325964	0.000426278	**
NCOA4	Natural killer T cell	0.391442	1.80952e-05	**
NCOA4	Neutrophil	0.311129	0.000795873	**
NCOA4	Plasmacytoid dendritic cell	0.382121	2.96069e-05	**
NCOA4	Regulatory T cell	0.465467	2.04989e-07	**
NCOA4	T follicular helper cell	0.489999	3.6199e-08	**
NCOA4	Type 1 T helper cell	0.465424	2.05588e-07	**
NCOA4	Type 17 T helper cell	0.330992	0.000342465	**
NCOA4	Type 2 T helper cell	0.143935	0.128268
TF	Activated B cell	0.350076	0.000144121	**
TF	Activated CD4 T cell	0.0284339	0.764974
TF	Activated CD8 T cell	0.251616	0.00718011	**
TF	Activated dendritic cell	0.20612	0.0285025	*
TF	CD56bright natural killer cell	0.209222	0.0261483	*
TF	CD56dim natural killer cell	-0.150795	0.110874
TF	Eosinophil	0.324453	0.000454941	**
TF	Gamma delta T cell	0.088779	0.349743
TF	Immature B cell	0.296579	0.00142418	**
TF	Immature dendritic cell	0.495173	2.46728e-08	**
TF	Macrophage	0.0898476	0.34395
TF	Mast cell	0.227385	0.0154321	*
TF	MDSC	0.202782	0.0312348	*
TF	Monocyte	0.218213	0.0202382	*
TF	Natural killer cell	0.163004	0.0845196
TF	Natural killer T cell	-0.0374073	0.694052
TF	Neutrophil	0.14628	0.1221
TF	Plasmacytoid dendritic cell	0.375079	4.25295e-05	**
TF	Regulatory T cell	0.0963414	0.310058
TF	T follicular helper cell	0.113905	0.229643
TF	Type 1 T helper cell	0.137253	0.147152
TF	Type 17 T helper cell	0.107963	0.255023
TF	Type 2 T helper cell	-0.239874	0.0104967	*
YY1AP1	Activated B cell	-0.166284	0.0783658
YY1AP1	Activated CD4 T cell	-0.0962431	0.310555
YY1AP1	Activated CD8 T cell	-0.138535	0.143374
YY1AP1	Activated dendritic cell	-0.0147246	0.876985
YY1AP1	CD56bright natural killer cell	0.147768	0.118308
YY1AP1	CD56dim natural killer cell	0.0754631	0.426964
YY1AP1	Eosinophil	-0.0641255	0.499816
YY1AP1	Gamma delta T cell	-0.0234518	0.80525
YY1AP1	Immature B cell	-0.152855	0.106026
YY1AP1	Immature dendritic cell	-0.130723	0.167561
YY1AP1	Macrophage	0.0105077	0.912045
YY1AP1	Mast cell	-0.133381	0.159014
YY1AP1	MDSC	-0.0437727	0.64526
YY1AP1	Monocyte	-0.148962	0.11533
YY1AP1	Natural killer cell	0.0338976	0.721516
YY1AP1	Natural killer T cell	0.0551816	0.561572
YY1AP1	Neutrophil	-0.0969968	0.306763
YY1AP1	Plasmacytoid dendritic cell	-0.000709227	0.994052
YY1AP1	Regulatory T cell	-0.0362743	0.702877
YY1AP1	T follicular helper cell	-0.0368405	0.698462
YY1AP1	Type 1 T helper cell	0.0351391	0.711759
YY1AP1	Type 17 T helper cell	-0.116333	0.219802
YY1AP1	Type 2 T helper cell	0.150334	0.11198
BAP1	Activated B cell	0.160096	0.090291
BAP1	Activated CD4 T cell	0.0543801	0.567278
BAP1	Activated CD8 T cell	0.0774028	0.415142
BAP1	Activated dendritic cell	-0.118103	0.212815
BAP1	CD56bright natural killer cell	-0.0368062	0.69873
BAP1	CD56dim natural killer cell	-0.161559	0.087349
BAP1	Eosinophil	0.115688	0.222387
BAP1	Gamma delta T cell	0.00332676	0.972103
BAP1	Immature B cell	0.149676	0.113579
BAP1	Immature dendritic cell	-0.0508302	0.592878
BAP1	Macrophage	0.0339489	0.721113
BAP1	Mast cell	-0.0474055	0.618058
BAP1	MDSC	0.011973	0.899839
BAP1	Monocyte	0.118737	0.210353
BAP1	Natural killer cell	-0.0549674	0.563094
BAP1	Natural killer T cell	-0.137329	0.146926
BAP1	Neutrophil	-0.0565239	0.552076
BAP1	Plasmacytoid dendritic cell	-0.0496737	0.601329
BAP1	Regulatory T cell	-0.0869883	0.359586
BAP1	T follicular helper cell	0.0100319	0.916013
BAP1	Type 1 T helper cell	-0.10434	0.271408
BAP1	Type 17 T helper cell	-0.0477093	0.615806
BAP1	Type 2 T helper cell	-0.191064	0.0426448	*
MAPK3	Activated B cell	0.394486	1.53576e-05	**
MAPK3	Activated CD4 T cell	-0.0067942	0.943063
MAPK3	Activated CD8 T cell	0.234387	0.0124622	*
MAPK3	Activated dendritic cell	0.398549	1.23061e-05	**
MAPK3	CD56bright natural killer cell	0.31638	0.000640397	**
MAPK3	CD56dim natural killer cell	-0.0100752	0.915652
MAPK3	Eosinophil	0.435459	1.43326e-06	**
MAPK3	Gamma delta T cell	0.427174	2.37483e-06	**
MAPK3	Immature B cell	0.387088	2.2817e-05	**
MAPK3	Immature dendritic cell	0.449615	5.86047e-07	**
MAPK3	Macrophage	0.308206	0.0008967	**
MAPK3	Mast cell	0.405361	8.43339e-06	**
MAPK3	MDSC	0.322865	0.000486947	**
MAPK3	Monocyte	0.438121	1.21509e-06	**
MAPK3	Natural killer cell	0.344234	0.000188954	**
MAPK3	Natural killer T cell	0.270647	0.00373943	**
MAPK3	Neutrophil	0.307637	0.000917637	**
MAPK3	Plasmacytoid dendritic cell	0.543113	5.13008e-10	**
MAPK3	Regulatory T cell	0.225195	0.0164789	*
MAPK3	T follicular helper cell	0.336869	0.000263897	**
MAPK3	Type 1 T helper cell	0.274329	0.00327826	**
MAPK3	Type 17 T helper cell	0.120848	0.2023
MAPK3	Type 2 T helper cell	-0.240571	0.0102676	*
MAPK1	Activated B cell	0.0533269	0.574819
MAPK1	Activated CD4 T cell	0.0984844	0.299368
MAPK1	Activated CD8 T cell	-0.0458297	0.629797
MAPK1	Activated dendritic cell	0.0325065	0.732503
MAPK1	CD56bright natural killer cell	0.0666448	0.483086
MAPK1	CD56dim natural killer cell	-0.185613	0.0490347	*
MAPK1	Eosinophil	0.0577446	0.543509
MAPK1	Gamma delta T cell	0.0177554	0.851929
MAPK1	Immature B cell	0.0691576	0.466703
MAPK1	Immature dendritic cell	0.0399675	0.674263
MAPK1	Macrophage	0.0403889	0.671026
MAPK1	Mast cell	0.162122	0.0862369
MAPK1	MDSC	-0.0404882	0.670265
MAPK1	Monocyte	0.0880871	0.353526
MAPK1	Natural killer cell	0.00917655	0.923151
MAPK1	Natural killer T cell	0.0793974	0.403187
MAPK1	Neutrophil	0.139514	0.140541
MAPK1	Plasmacytoid dendritic cell	0.147348	0.119368
MAPK1	Regulatory T cell	-0.0242293	0.798928
MAPK1	T follicular helper cell	0.100255	0.290722
MAPK1	Type 1 T helper cell	0.0675678	0.477033
MAPK1	Type 17 T helper cell	0.0716866	0.450527
MAPK1	Type 2 T helper cell	0.19825	0.0352967	*
ALOXE3	Activated B cell	-0.148665	0.116066
ALOXE3	Activated CD4 T cell	0.009935	0.916821
ALOXE3	Activated CD8 T cell	0.0921493	0.33168
ALOXE3	Activated dendritic cell	0.127111	0.179714
ALOXE3	CD56bright natural killer cell	0.112824	0.234123
ALOXE3	CD56dim natural killer cell	0.264462	0.00464626	**
ALOXE3	Eosinophil	-0.0883512	0.352079
ALOXE3	Gamma delta T cell	0.176925	0.0608414
ALOXE3	Immature B cell	-0.09098	0.337878
ALOXE3	Immature dendritic cell	0.0747134	0.431584
ALOXE3	Macrophage	-0.128625	0.174545
ALOXE3	Mast cell	0.0029181	0.975529
ALOXE3	MDSC	0.0561776	0.554518
ALOXE3	Monocyte	-0.100412	0.289964
ALOXE3	Natural killer cell	-0.0136717	0.885719
ALOXE3	Natural killer T cell	0.190377	0.0434097	*
ALOXE3	Neutrophil	0.252423	0.00699066	**
ALOXE3	Plasmacytoid dendritic cell	0.0523814	0.581627
ALOXE3	Regulatory T cell	0.0995348	0.294219
ALOXE3	T follicular helper cell	0.0603147	0.525687
ALOXE3	Type 1 T helper cell	-0.0396862	0.676427
ALOXE3	Type 17 T helper cell	0.170666	0.0707132
ALOXE3	Type 2 T helper cell	-0.0629429	0.507773
PEBP1	Activated B cell	-0.222785	0.0177017	*
PEBP1	Activated CD4 T cell	-0.145588	0.123896
PEBP1	Activated CD8 T cell	-0.229542	0.0144578	*
PEBP1	Activated dendritic cell	-0.296133	0.0014491	**
PEBP1	CD56bright natural killer cell	-0.037341	0.694568
PEBP1	CD56dim natural killer cell	-0.315077	0.000676117	**
PEBP1	Eosinophil	-0.262248	0.00501562	**
PEBP1	Gamma delta T cell	-0.305544	0.000998571	**
PEBP1	Immature B cell	-0.272755	0.0034688	**
PEBP1	Immature dendritic cell	-0.249288	0.00775205	**
PEBP1	Macrophage	-0.276153	0.00306931	**
PEBP1	Mast cell	-0.358243	9.78113e-05	**
PEBP1	MDSC	-0.323561	0.000472678	**
PEBP1	Monocyte	-0.262071	0.00504623	**
PEBP1	Natural killer cell	-0.289167	0.00189407	**
PEBP1	Natural killer T cell	-0.369198	5.71883e-05	**
PEBP1	Neutrophil	-0.274159	0.00329838	**
PEBP1	Plasmacytoid dendritic cell	-0.36713	6.33821e-05	**
PEBP1	Regulatory T cell	-0.311281	0.000790914	**
PEBP1	T follicular helper cell	-0.331878	0.000329378	**
PEBP1	Type 1 T helper cell	-0.302823	0.0011135	**
PEBP1	Type 17 T helper cell	-0.256447	0.00611094	**
PEBP1	Type 2 T helper cell	0.0672353	0.479209
BECN1	Activated B cell	0.338667	0.000243415	**
BECN1	Activated CD4 T cell	0.0514263	0.588543
BECN1	Activated CD8 T cell	0.149653	0.113634
BECN1	Activated dendritic cell	0.0826981	0.383857
BECN1	CD56bright natural killer cell	-0.0592154	0.533273
BECN1	CD56dim natural killer cell	-0.0820512	0.387601
BECN1	Eosinophil	0.272131	0.00354704	**
BECN1	Gamma delta T cell	0.00674002	0.943516
BECN1	Immature B cell	0.310417	0.000819422	**
BECN1	Immature dendritic cell	0.216195	0.0214539	*
BECN1	Macrophage	0.0522478	0.582593
BECN1	Mast cell	0.254181	0.00659346	**
BECN1	MDSC	0.0658936	0.488043
BECN1	Monocyte	0.281298	0.00254299	**
BECN1	Natural killer cell	0.00338439	0.97162
BECN1	Natural killer T cell	-0.128198	0.175992
BECN1	Neutrophil	0.0316556	0.739251
BECN1	Plasmacytoid dendritic cell	0.0671445	0.479804
BECN1	Regulatory T cell	-0.0374809	0.693481
BECN1	T follicular helper cell	0.112952	0.23359
BECN1	Type 1 T helper cell	-0.0526086	0.579987
BECN1	Type 17 T helper cell	0.00431216	0.963845
BECN1	Type 2 T helper cell	-0.276155	0.00306909	**
NOX4	Activated B cell	-0.131888	0.163773
NOX4	Activated CD4 T cell	-0.191133	0.0425688	*
NOX4	Activated CD8 T cell	-0.0485993	0.609228
NOX4	Activated dendritic cell	0.0220221	0.816908
NOX4	CD56bright natural killer cell	0.156432	0.0980034
NOX4	CD56dim natural killer cell	0.030042	0.7521
NOX4	Eosinophil	-0.0676055	0.476786
NOX4	Gamma delta T cell	0.312387	0.00075576	**
NOX4	Immature B cell	-0.171071	0.0700377
NOX4	Immature dendritic cell	0.168193	0.0749536
NOX4	Macrophage	0.234058	0.0125898	*
NOX4	Mast cell	0.165714	0.0794096
NOX4	MDSC	0.0618288	0.515328
NOX4	Monocyte	-0.0548303	0.564069
NOX4	Natural killer cell	0.442566	9.19422e-07	**
NOX4	Natural killer T cell	0.334223	0.000296935	**
NOX4	Neutrophil	0.163412	0.0837324
NOX4	Plasmacytoid dendritic cell	0.240331	0.0103461	*
NOX4	Regulatory T cell	0.136536	0.149296
NOX4	T follicular helper cell	0.222184	0.0180188	*
NOX4	Type 1 T helper cell	0.195823	0.0376494	*
NOX4	Type 17 T helper cell	0.177466	0.0600436
NOX4	Type 2 T helper cell	0.0982224	0.300662
ACSF2	Activated B cell	0.167156	0.0767915
ACSF2	Activated CD4 T cell	0.0291519	0.759218
ACSF2	Activated CD8 T cell	0.232217	0.0133242	*
ACSF2	Activated dendritic cell	0.173218	0.0665414
ACSF2	CD56bright natural killer cell	-0.010765	0.9099
ACSF2	CD56dim natural killer cell	0.256547	0.00609033	**
ACSF2	Eosinophil	0.11725	0.216162
ACSF2	Gamma delta T cell	0.109752	0.24719
ACSF2	Immature B cell	0.155701	0.0996023
ACSF2	Immature dendritic cell	0.105073	0.268038
ACSF2	Macrophage	0.0255887	0.787906
ACSF2	Mast cell	0.0338054	0.722243
ACSF2	MDSC	0.11419	0.228473
ACSF2	Monocyte	0.135732	0.151728
ACSF2	Natural killer cell	0.00314391	0.973636
ACSF2	Natural killer T cell	0.113131	0.232846
ACSF2	Neutrophil	-0.123999	0.190696
ACSF2	Plasmacytoid dendritic cell	0.0235861	0.804157
ACSF2	Regulatory T cell	0.053792	0.571483
ACSF2	T follicular helper cell	0.0555546	0.558925
ACSF2	Type 1 T helper cell	0.0534309	0.574072
ACSF2	Type 17 T helper cell	0.0925198	0.329731
ACSF2	Type 2 T helper cell	-0.166195	0.0785273
IREB2	Activated B cell	-0.157489	0.0957281
IREB2	Activated CD4 T cell	0.103729	0.274241
IREB2	Activated CD8 T cell	-0.0865737	0.361889
IREB2	Activated dendritic cell	-0.146468	0.121617
IREB2	CD56bright natural killer cell	-0.37245	4.85846e-05	**
IREB2	CD56dim natural killer cell	-0.0196942	0.835975
IREB2	Eosinophil	-0.129686	0.170985
IREB2	Gamma delta T cell	-0.173344	0.0663416
IREB2	Immature B cell	-0.113051	0.233177
IREB2	Immature dendritic cell	-0.230951	0.0138507	*
IREB2	Macrophage	-0.194705	0.0387766	*
IREB2	Mast cell	-0.0666967	0.482745
IREB2	MDSC	-0.166345	0.0782559
IREB2	Monocyte	-0.150945	0.110515
IREB2	Natural killer cell	-0.253022	0.00685306	**
IREB2	Natural killer T cell	-0.236112	0.0118124	*
IREB2	Neutrophil	-0.0796104	0.401923
IREB2	Plasmacytoid dendritic cell	-0.219264	0.0196291	*
IREB2	Regulatory T cell	-0.188056	0.0460795	*
IREB2	T follicular helper cell	-0.143144	0.1304
IREB2	Type 1 T helper cell	-0.18471	0.0501654
IREB2	Type 17 T helper cell	-0.0461543	0.627371
IREB2	Type 2 T helper cell	0.0953819	0.314924
HMOX1	Activated B cell	0.262011	0.00505673	**
HMOX1	Activated CD4 T cell	0.336959	0.000262829	**
HMOX1	Activated CD8 T cell	0.393147	1.65094e-05	**
HMOX1	Activated dendritic cell	0.509346	8.35105e-09	**
HMOX1	CD56bright natural killer cell	0.2953	0.00149678	**
HMOX1	CD56dim natural killer cell	0.115164	0.2245
HMOX1	Eosinophil	0.484703	5.32449e-08	**
HMOX1	Gamma delta T cell	0.69583	1.18977e-17	**
HMOX1	Immature B cell	0.359863	9.04596e-05	**
HMOX1	Immature dendritic cell	0.540671	6.34306e-10	**
HMOX1	Macrophage	0.676734	1.9132e-16	**
HMOX1	Mast cell	0.585973	9.22317e-12	**
HMOX1	MDSC	0.643302	1.54746e-14	**
HMOX1	Monocyte	0.495427	2.42077e-08	**
HMOX1	Natural killer cell	0.705299	2.76544e-18	**
HMOX1	Natural killer T cell	0.609681	7.66981e-13	**
HMOX1	Neutrophil	0.539326	7.12409e-10	**
HMOX1	Plasmacytoid dendritic cell	0.573933	3.0247e-11	**
HMOX1	Regulatory T cell	0.685907	5.17343e-17	**
HMOX1	T follicular helper cell	0.736001	1.59298e-20	**
HMOX1	Type 1 T helper cell	0.612846	5.4164e-13	**
HMOX1	Type 17 T helper cell	0.408671	6.9975e-06	**
HMOX1	Type 2 T helper cell	0.0957794	0.312902
CDO1	Activated B cell	0.565738	6.60703e-11	**
CDO1	Activated CD4 T cell	-0.0131241	0.890268
CDO1	Activated CD8 T cell	0.190965	0.0427549	*
CDO1	Activated dendritic cell	0.311805	0.000774068	**
CDO1	CD56bright natural killer cell	0.22788	0.0152038	*
CDO1	CD56dim natural killer cell	-0.126436	0.182055
CDO1	Eosinophil	0.464921	2.12733e-07	**
CDO1	Gamma delta T cell	0.123112	0.19391
CDO1	Immature B cell	0.513305	6.11554e-09	**
CDO1	Immature dendritic cell	0.408521	7.05725e-06	**
CDO1	Macrophage	0.247617	0.00818712	**
CDO1	Mast cell	0.306663	0.000954502	**
CDO1	MDSC	0.201928	0.0319685	*
CDO1	Monocyte	0.436963	1.30581e-06	**
CDO1	Natural killer cell	0.204889	0.0294858	*
CDO1	Natural killer T cell	-0.0211135	0.824338
CDO1	Neutrophil	0.00384354	0.967772
CDO1	Plasmacytoid dendritic cell	0.476176	9.77745e-08	**
CDO1	Regulatory T cell	0.0689322	0.46816
CDO1	T follicular helper cell	0.220824	0.018754	*
CDO1	Type 1 T helper cell	0.213478	0.0231891	*
CDO1	Type 17 T helper cell	-0.10174	0.2836
CDO1	Type 2 T helper cell	-0.340237	0.000226741	**
ALOX15B	Activated B cell	0.300032	0.0012438	**
ALOX15B	Activated CD4 T cell	0.265429	0.00449255	**
ALOX15B	Activated CD8 T cell	0.315894	0.000653511	**
ALOX15B	Activated dendritic cell	0.486726	4.59822e-08	**
ALOX15B	CD56bright natural killer cell	0.329209	0.000370279	**
ALOX15B	CD56dim natural killer cell	0.235264	0.012128	*
ALOX15B	Eosinophil	0.404965	8.62264e-06	**
ALOX15B	Gamma delta T cell	0.470892	1.41329e-07	**
ALOX15B	Immature B cell	0.367211	6.31265e-05	**
ALOX15B	Immature dendritic cell	0.427763	2.29202e-06	**
ALOX15B	Macrophage	0.594204	3.97957e-12	**
ALOX15B	Mast cell	0.415748	4.66351e-06	**
ALOX15B	MDSC	0.509326	8.36402e-09	**
ALOX15B	Monocyte	0.518549	4.02308e-09	**
ALOX15B	Natural killer cell	0.508745	8.75233e-09	**
ALOX15B	Natural killer T cell	0.496893	2.16884e-08	**
ALOX15B	Neutrophil	0.449735	5.81536e-07	**
ALOX15B	Plasmacytoid dendritic cell	0.536959	8.7289e-10	**
ALOX15B	Regulatory T cell	0.539886	6.78831e-10	**
ALOX15B	T follicular helper cell	0.577445	2.14987e-11	**
ALOX15B	Type 1 T helper cell	0.519731	3.65707e-09	**
ALOX15B	Type 17 T helper cell	0.457145	3.58169e-07	**
ALOX15B	Type 2 T helper cell	0.041759	0.660546
LONP1	Activated B cell	-0.510319	7.73849e-09	**
LONP1	Activated CD4 T cell	-0.235956	0.0118699	*
LONP1	Activated CD8 T cell	-0.396031	1.4122e-05	**
LONP1	Activated dendritic cell	-0.563357	8.2579e-11	**
LONP1	CD56bright natural killer cell	-0.392491	1.71035e-05	**
LONP1	CD56dim natural killer cell	-0.132196	0.162784
LONP1	Eosinophil	-0.478312	8.40987e-08	**
LONP1	Gamma delta T cell	-0.228206	0.0150546	*
LONP1	Immature B cell	-0.537748	8.1587e-10	**
LONP1	Immature dendritic cell	-0.461362	2.70445e-07	**
LONP1	Macrophage	-0.432198	1.75118e-06	**
LONP1	Mast cell	-0.413747	5.23548e-06	**
LONP1	MDSC	-0.473175	1.20624e-07	**
LONP1	Monocyte	-0.484605	5.36221e-08	**
LONP1	Natural killer cell	-0.36055	8.75e-05	**
LONP1	Natural killer T cell	-0.390029	1.95157e-05	**
LONP1	Neutrophil	-0.274354	0.00327531	**
LONP1	Plasmacytoid dendritic cell	-0.532878	1.23455e-09	**
LONP1	Regulatory T cell	-0.432366	1.73324e-06	**
LONP1	T follicular helper cell	-0.428465	2.19704e-06	**
LONP1	Type 1 T helper cell	-0.515474	5.14749e-09	**
LONP1	Type 17 T helper cell	-0.123402	0.192855
LONP1	Type 2 T helper cell	0.107177	0.258519
IFNG	Activated B cell	0.35761	0.000100831	**
IFNG	Activated CD4 T cell	0.578173	2.00176e-11	**
IFNG	Activated CD8 T cell	0.761128	1.32931e-22	**
IFNG	Activated dendritic cell	0.517069	4.53103e-09	**
IFNG	CD56bright natural killer cell	0.292894	0.00164265	**
IFNG	CD56dim natural killer cell	0.248293	0.00800854	**
IFNG	Eosinophil	0.362162	8.09057e-05	**
IFNG	Gamma delta T cell	0.451131	5.31244e-07	**
IFNG	Immature B cell	0.413656	5.26299e-06	**
IFNG	Immature dendritic cell	0.250948	0.00734041	**
IFNG	Macrophage	0.491101	3.33789e-08	**
IFNG	Mast cell	0.396309	1.39092e-05	**
IFNG	MDSC	0.646061	1.0992e-14	**
IFNG	Monocyte	0.464719	2.15654e-07	**
IFNG	Natural killer cell	0.481709	6.60355e-08	**
IFNG	Natural killer T cell	0.579811	1.70413e-11	**
IFNG	Neutrophil	0.118857	0.20989
IFNG	Plasmacytoid dendritic cell	0.28933	0.0018824	**
IFNG	Regulatory T cell	0.599908	2.1917e-12	**
IFNG	T follicular helper cell	0.563562	8.10097e-11	**
IFNG	Type 1 T helper cell	0.577546	2.12859e-11	**
IFNG	Type 17 T helper cell	0.334346	0.000295321	**
IFNG	Type 2 T helper cell	0.0631648	0.506275
EGLN2	Activated B cell	0.150108	0.112528
EGLN2	Activated CD4 T cell	-0.00194709	0.98367
EGLN2	Activated CD8 T cell	0.043091	0.650419
EGLN2	Activated dendritic cell	-0.0088212	0.926118
EGLN2	CD56bright natural killer cell	-0.0181761	0.848461
EGLN2	CD56dim natural killer cell	-0.00632858	0.946959
EGLN2	Eosinophil	0.196667	0.036817	*
EGLN2	Gamma delta T cell	0.150859	0.110719
EGLN2	Immature B cell	0.155569	0.0998946
EGLN2	Immature dendritic cell	0.0919635	0.332659
EGLN2	Macrophage	0.138319	0.144005
EGLN2	Mast cell	0.0639226	0.501177
EGLN2	MDSC	0.0573608	0.546196
EGLN2	Monocyte	0.20483	0.0295334	*
EGLN2	Natural killer cell	0.133382	0.159012
EGLN2	Natural killer T cell	0.0637334	0.502447
EGLN2	Neutrophil	-0.0924609	0.33004
EGLN2	Plasmacytoid dendritic cell	0.159718	0.0910631
EGLN2	Regulatory T cell	0.0490695	0.605765
EGLN2	T follicular helper cell	0.14956	0.113862
EGLN2	Type 1 T helper cell	0.0752233	0.428439
EGLN2	Type 17 T helper cell	-0.0287052	0.762797
EGLN2	Type 2 T helper cell	-0.0735467	0.438831
TP53	Activated B cell	-0.340281	0.000226294	**
TP53	Activated CD4 T cell	-0.0560403	0.555488
TP53	Activated CD8 T cell	-0.122735	0.195291
TP53	Activated dendritic cell	-0.188332	0.0457546	*
TP53	CD56bright natural killer cell	0.110023	0.246016
TP53	CD56dim natural killer cell	0.0741708	0.434946
TP53	Eosinophil	-0.369881	5.5271e-05	**
TP53	Gamma delta T cell	-0.140977	0.136383
TP53	Immature B cell	-0.354477	0.000117105	**
TP53	Immature dendritic cell	-0.365408	6.90069e-05	**
TP53	Macrophage	-0.117994	0.21324
TP53	Mast cell	-0.21337	0.0232603	*
TP53	MDSC	-0.143802	0.128623
TP53	Monocyte	-0.288602	0.00193515	**
TP53	Natural killer cell	-0.0874353	0.357112
TP53	Natural killer T cell	-0.0376831	0.69191
TP53	Neutrophil	-0.23278	0.0130959	*
TP53	Plasmacytoid dendritic cell	-0.31039	0.00082032	**
TP53	Regulatory T cell	-0.137399	0.146719
TP53	T follicular helper cell	-0.204836	0.0295282	*
TP53	Type 1 T helper cell	-0.0729402	0.442625
TP53	Type 17 T helper cell	-0.197102	0.0363936	*
TP53	Type 2 T helper cell	0.326434	0.000417705	**
EMC2	Activated B cell	0.0156288	0.869496
EMC2	Activated CD4 T cell	0.0851168	0.370054
EMC2	Activated CD8 T cell	0.099967	0.292116
EMC2	Activated dendritic cell	-0.0571428	0.547724
EMC2	CD56bright natural killer cell	-0.152845	0.10605
EMC2	CD56dim natural killer cell	0.205081	0.0293306	*
EMC2	Eosinophil	-0.00431632	0.96381
EMC2	Gamma delta T cell	-0.0519738	0.584574
EMC2	Immature B cell	-0.00711716	0.940361
EMC2	Immature dendritic cell	0.0423825	0.655797
EMC2	Macrophage	-0.0655948	0.490022
EMC2	Mast cell	0.0740816	0.4355
EMC2	MDSC	-0.0196957	0.835963
EMC2	Monocyte	-0.00717211	0.939901
EMC2	Natural killer cell	-0.206691	0.0280559	*
EMC2	Natural killer T cell	-0.10016	0.291183
EMC2	Neutrophil	-0.0515312	0.587781
EMC2	Plasmacytoid dendritic cell	-0.148314	0.116938
EMC2	Regulatory T cell	-0.0515629	0.587552
EMC2	T follicular helper cell	-0.0966129	0.308691
EMC2	Type 1 T helper cell	-0.156157	0.0986027
EMC2	Type 17 T helper cell	0.0875633	0.356406
EMC2	Type 2 T helper cell	-0.0900741	0.34273
ABCC1	Activated B cell	-0.570271	4.3001e-11	**
ABCC1	Activated CD4 T cell	-0.243337	0.00940129	**
ABCC1	Activated CD8 T cell	-0.384971	2.55095e-05	**
ABCC1	Activated dendritic cell	-0.315951	0.000651964	**
ABCC1	CD56bright natural killer cell	-0.0512046	0.590154
ABCC1	CD56dim natural killer cell	-0.0610627	0.520556
ABCC1	Eosinophil	-0.576369	2.38793e-11	**
ABCC1	Gamma delta T cell	-0.292488	0.00166843	**
ABCC1	Immature B cell	-0.568524	5.078e-11	**
ABCC1	Immature dendritic cell	-0.526371	2.12555e-09	**
ABCC1	Macrophage	-0.323185	0.000480325	**
ABCC1	Mast cell	-0.364281	7.29392e-05	**
ABCC1	MDSC	-0.35519	0.000113202	**
ABCC1	Monocyte	-0.516761	4.64415e-09	**
ABCC1	Natural killer cell	-0.269551	0.00388751	**
ABCC1	Natural killer T cell	-0.133326	0.159188
ABCC1	Neutrophil	-0.0720487	0.448236
ABCC1	Plasmacytoid dendritic cell	-0.337234	0.000259612	**
ABCC1	Regulatory T cell	-0.272293	0.00352649	**
ABCC1	T follicular helper cell	-0.35581	0.000109903	**
ABCC1	Type 1 T helper cell	-0.225564	0.0162987	*
ABCC1	Type 17 T helper cell	-0.14234	0.132598
ABCC1	Type 2 T helper cell	0.419272	3.79718e-06	**
PRKAA2	Activated B cell	0.193847	0.03966	*
PRKAA2	Activated CD4 T cell	-0.298399	0.00132632	**
PRKAA2	Activated CD8 T cell	-0.138265	0.144165
PRKAA2	Activated dendritic cell	-0.0701004	0.460636
PRKAA2	CD56bright natural killer cell	-0.171855	0.0687445
PRKAA2	CD56dim natural killer cell	-0.144191	0.127583
PRKAA2	Eosinophil	0.138176	0.144425
PRKAA2	Gamma delta T cell	-0.0776007	0.413947
PRKAA2	Immature B cell	0.127595	0.17805
PRKAA2	Immature dendritic cell	0.178389	0.0587031
PRKAA2	Macrophage	-0.157996	0.0946498
PRKAA2	Mast cell	0.0335468	0.724282
PRKAA2	MDSC	-0.161276	0.0879128
PRKAA2	Monocyte	0.0787622	0.406972
PRKAA2	Natural killer cell	0.0028138	0.976403
PRKAA2	Natural killer T cell	-0.322127	0.000502513	**
PRKAA2	Neutrophil	-0.0910979	0.337249
PRKAA2	Plasmacytoid dendritic cell	0.142172	0.133058
PRKAA2	Regulatory T cell	-0.188723	0.0452979	*
PRKAA2	T follicular helper cell	-0.146561	0.121376
PRKAA2	Type 1 T helper cell	-0.145821	0.123289
PRKAA2	Type 17 T helper cell	-0.0137501	0.885069
PRKAA2	Type 2 T helper cell	-0.265705	0.00444956	**
PRKAA1	Activated B cell	0.320434	0.000540002	**
PRKAA1	Activated CD4 T cell	0.0362682	0.702925
PRKAA1	Activated CD8 T cell	0.0873316	0.357686
PRKAA1	Activated dendritic cell	0.127875	0.177091
PRKAA1	CD56bright natural killer cell	-0.00313972	0.973671
PRKAA1	CD56dim natural killer cell	-0.248777	0.00788297	**
PRKAA1	Eosinophil	0.250104	0.0075471	**
PRKAA1	Gamma delta T cell	0.00242583	0.979656
PRKAA1	Immature B cell	0.309933	0.000835809	**
PRKAA1	Immature dendritic cell	0.17335	0.0663318
PRKAA1	Macrophage	0.0409831	0.666473
PRKAA1	Mast cell	0.188878	0.0451188	*
PRKAA1	MDSC	0.0400412	0.673697
PRKAA1	Monocyte	0.234884	0.0122719	*
PRKAA1	Natural killer cell	0.0127665	0.893239
PRKAA1	Natural killer T cell	-0.0336908	0.723147
PRKAA1	Neutrophil	0.0725629	0.444995
PRKAA1	Plasmacytoid dendritic cell	0.257764	0.00584515	**
PRKAA1	Regulatory T cell	-0.00724664	0.939278
PRKAA1	T follicular helper cell	0.0407054	0.668599
PRKAA1	Type 1 T helper cell	0.0776778	0.413481
PRKAA1	Type 17 T helper cell	-0.0904133	0.340908
PRKAA1	Type 2 T helper cell	-0.164427	0.081803
G6PD	Activated B cell	-0.138077	0.144716
G6PD	Activated CD4 T cell	-0.208309	0.0268229	*
G6PD	Activated CD8 T cell	-0.125049	0.186937
G6PD	Activated dendritic cell	-0.0440589	0.643099
G6PD	CD56bright natural killer cell	0.080272	0.39801
G6PD	CD56dim natural killer cell	0.0813571	0.391642
G6PD	Eosinophil	-0.09104	0.337558
G6PD	Gamma delta T cell	0.195341	0.0381319	*
G6PD	Immature B cell	-0.143854	0.128484
G6PD	Immature dendritic cell	-0.050911	0.59229
G6PD	Macrophage	-0.0496915	0.601199
G6PD	Mast cell	-0.0051843	0.956539
G6PD	MDSC	-0.135056	0.153798
G6PD	Monocyte	0.0368968	0.698024
G6PD	Natural killer cell	0.07143	0.452153
G6PD	Natural killer T cell	0.0991104	0.296292
G6PD	Neutrophil	0.0159674	0.866694
G6PD	Plasmacytoid dendritic cell	0.0859808	0.365198
G6PD	Regulatory T cell	-0.0433029	0.648813
G6PD	T follicular helper cell	-0.0209566	0.825623
G6PD	Type 1 T helper cell	-0.101231	0.286029
G6PD	Type 17 T helper cell	0.0788636	0.406367
G6PD	Type 2 T helper cell	-0.0417714	0.660451
TGFBR1	Activated B cell	0.0242468	0.798786
TGFBR1	Activated CD4 T cell	-0.198489	0.0350722	*
TGFBR1	Activated CD8 T cell	-0.042379	0.655824
TGFBR1	Activated dendritic cell	0.150722	0.111048
TGFBR1	CD56bright natural killer cell	0.101072	0.286789
TGFBR1	CD56dim natural killer cell	-0.0165157	0.862161
TGFBR1	Eosinophil	0.0852246	0.369446
TGFBR1	Gamma delta T cell	0.254958	0.00642443	**
TGFBR1	Immature B cell	0.0477233	0.615702
TGFBR1	Immature dendritic cell	0.216255	0.0214167	*
TGFBR1	Macrophage	0.180045	0.0563585
TGFBR1	Mast cell	0.204244	0.0300121	*
TGFBR1	MDSC	0.10948	0.248369
TGFBR1	Monocyte	0.128531	0.174861
TGFBR1	Natural killer cell	0.344039	0.000190658	**
TGFBR1	Natural killer T cell	0.284106	0.00229142	**
TGFBR1	Neutrophil	0.130496	0.168305
TGFBR1	Plasmacytoid dendritic cell	0.33906	0.000239137	**
TGFBR1	Regulatory T cell	0.150201	0.112302
TGFBR1	T follicular helper cell	0.2986	0.00131591	**
TGFBR1	Type 1 T helper cell	0.224555	0.0167963	*
TGFBR1	Type 17 T helper cell	0.122862	0.194823
TGFBR1	Type 2 T helper cell	0.0610126	0.520899
ATF3	Activated B cell	-0.199917	0.0337535	*
ATF3	Activated CD4 T cell	-0.0656033	0.489966
ATF3	Activated CD8 T cell	-0.124433	0.189134
ATF3	Activated dendritic cell	-0.120874	0.202201
ATF3	CD56bright natural killer cell	-0.219259	0.0196318	*
ATF3	CD56dim natural killer cell	0.0712803	0.453104
ATF3	Eosinophil	-0.0795663	0.402185
ATF3	Gamma delta T cell	0.09497	0.317028
ATF3	Immature B cell	-0.188595	0.0454477	*
ATF3	Immature dendritic cell	0.0528441	0.578291
ATF3	Macrophage	-0.0128526	0.892523
ATF3	Mast cell	0.170068	0.071721
ATF3	MDSC	-0.0736605	0.438121
ATF3	Monocyte	-0.187629	0.0465848	*
ATF3	Natural killer cell	0.0192577	0.839561
ATF3	Natural killer T cell	-0.055414	0.559922
ATF3	Neutrophil	0.206211	0.0284309	*
ATF3	Plasmacytoid dendritic cell	-0.0953095	0.315293
ATF3	Regulatory T cell	-0.045195	0.634551
ATF3	T follicular helper cell	-0.0571687	0.547542
ATF3	Type 1 T helper cell	-0.113687	0.230544
ATF3	Type 17 T helper cell	0.234536	0.0124048	*
ATF3	Type 2 T helper cell	0.0971283	0.306105
TNFAIP3	Activated B cell	-0.224649	0.0167496	*
TNFAIP3	Activated CD4 T cell	0.181286	0.0546536
TNFAIP3	Activated CD8 T cell	-0.0314641	0.740772
TNFAIP3	Activated dendritic cell	0.0701563	0.460277
TNFAIP3	CD56bright natural killer cell	0.239881	0.0104943	*
TNFAIP3	CD56dim natural killer cell	0.0538741	0.570895
TNFAIP3	Eosinophil	-0.142067	0.133348
TNFAIP3	Gamma delta T cell	-0.0359879	0.705115
TNFAIP3	Immature B cell	-0.179026	0.0577917
TNFAIP3	Immature dendritic cell	-0.111028	0.241701
TNFAIP3	Macrophage	0.151662	0.108812
TNFAIP3	Mast cell	0.01809	0.849171
TNFAIP3	MDSC	0.103371	0.275909
TNFAIP3	Monocyte	-0.0928591	0.327953
TNFAIP3	Natural killer cell	0.0895434	0.345593
TNFAIP3	Natural killer T cell	0.211981	0.0241953	*
TNFAIP3	Neutrophil	0.160409	0.0896554
TNFAIP3	Plasmacytoid dendritic cell	-0.0170478	0.857766
TNFAIP3	Regulatory T cell	0.211928	0.0242313	*
TNFAIP3	T follicular helper cell	0.0458724	0.629477
TNFAIP3	Type 1 T helper cell	0.169689	0.0723639
TNFAIP3	Type 17 T helper cell	0.0914487	0.335385
TNFAIP3	Type 2 T helper cell	0.4899	3.64621e-08	**
PHKG2	Activated B cell	-0.0725562	0.445037
PHKG2	Activated CD4 T cell	-0.16467	0.0813475
PHKG2	Activated CD8 T cell	-0.0517252	0.586375
PHKG2	Activated dendritic cell	-0.0850761	0.370284
PHKG2	CD56bright natural killer cell	-0.131472	0.165118
PHKG2	CD56dim natural killer cell	-0.0124874	0.89556
PHKG2	Eosinophil	-0.0530467	0.576832
PHKG2	Gamma delta T cell	-0.176886	0.0608994
PHKG2	Immature B cell	-0.0755939	0.426161
PHKG2	Immature dendritic cell	-0.0855617	0.367549
PHKG2	Macrophage	-0.22993	0.0142884	*
PHKG2	Mast cell	-0.267186	0.00422504	**
PHKG2	MDSC	-0.156304	0.0982828
PHKG2	Monocyte	-0.126648	0.181317
PHKG2	Natural killer cell	-0.335403	0.000281755	**
PHKG2	Natural killer T cell	-0.155474	0.100103
PHKG2	Neutrophil	-0.157324	0.0960794
PHKG2	Plasmacytoid dendritic cell	-0.202546	0.0314362	*
PHKG2	Regulatory T cell	-0.197814	0.0357097	*
PHKG2	T follicular helper cell	-0.262697	0.00493872	**
PHKG2	Type 1 T helper cell	-0.236714	0.0115924	*
PHKG2	Type 17 T helper cell	-0.207498	0.0274355	*
PHKG2	Type 2 T helper cell	-0.323141	0.000481233	**
CDKN2A	Activated B cell	0.13605	0.150762
CDKN2A	Activated CD4 T cell	0.0512009	0.59018
CDKN2A	Activated CD8 T cell	0.0355209	0.708767
CDKN2A	Activated dendritic cell	0.0110907	0.907186
CDKN2A	CD56bright natural killer cell	-0.018856	0.842864
CDKN2A	CD56dim natural killer cell	-0.0462511	0.626649
CDKN2A	Eosinophil	0.137665	0.14593
CDKN2A	Gamma delta T cell	0.0967056	0.308224
CDKN2A	Immature B cell	0.12756	0.17817
CDKN2A	Immature dendritic cell	0.0767244	0.419255
CDKN2A	Macrophage	0.0736088	0.438443
CDKN2A	Mast cell	0.0827046	0.38382
CDKN2A	MDSC	0.073249	0.440691
CDKN2A	Monocyte	0.0584705	0.538445
CDKN2A	Natural killer cell	0.110819	0.242596
CDKN2A	Natural killer T cell	-0.0349395	0.713325
CDKN2A	Neutrophil	0.0114213	0.904433
CDKN2A	Plasmacytoid dendritic cell	0.121113	0.201304
CDKN2A	Regulatory T cell	0.077538	0.414325
CDKN2A	T follicular helper cell	0.0856643	0.366973
CDKN2A	Type 1 T helper cell	0.0211062	0.824398
CDKN2A	Type 17 T helper cell	-0.0193678	0.838657
CDKN2A	Type 2 T helper cell	-0.110292	0.244855
ACVR1B	Activated B cell	-0.476745	9.39354e-08	**
ACVR1B	Activated CD4 T cell	-0.363085	7.73402e-05	**
ACVR1B	Activated CD8 T cell	-0.544014	4.74178e-10	**
ACVR1B	Activated dendritic cell	-0.48791	4.21838e-08	**
ACVR1B	CD56bright natural killer cell	-0.350665	0.000140198	**
ACVR1B	CD56dim natural killer cell	-0.138382	0.14382
ACVR1B	Eosinophil	-0.489612	3.72431e-08	**
ACVR1B	Gamma delta T cell	-0.346732	0.000168397	**
ACVR1B	Immature B cell	-0.53042	1.51785e-09	**
ACVR1B	Immature dendritic cell	-0.34033	0.000225788	**
ACVR1B	Macrophage	-0.425045	2.69811e-06	**
ACVR1B	Mast cell	-0.308573	0.000883411	**
ACVR1B	MDSC	-0.536728	8.90325e-10	**
ACVR1B	Monocyte	-0.491977	3.12873e-08	**
ACVR1B	Natural killer cell	-0.341015	0.000218876	**
ACVR1B	Natural killer T cell	-0.436553	1.33943e-06	**
ACVR1B	Neutrophil	-0.0963459	0.310036
ACVR1B	Plasmacytoid dendritic cell	-0.441217	1.00105e-06	**
ACVR1B	Regulatory T cell	-0.459225	3.11979e-07	**
ACVR1B	T follicular helper cell	-0.470008	1.50228e-07	**
ACVR1B	Type 1 T helper cell	-0.468034	1.72046e-07	**
ACVR1B	Type 17 T helper cell	-0.107324	0.257864
ACVR1B	Type 2 T helper cell	0.15	0.112791
ZEB1	Activated B cell	0.412562	5.60454e-06	**
ZEB1	Activated CD4 T cell	0.21181	0.0243124	*
ZEB1	Activated CD8 T cell	0.412673	5.56887e-06	**
ZEB1	Activated dendritic cell	0.548104	3.30702e-10	**
ZEB1	CD56bright natural killer cell	0.313206	0.00073066	**
ZEB1	CD56dim natural killer cell	0.115265	0.224093
ZEB1	Eosinophil	0.483303	5.89004e-08	**
ZEB1	Gamma delta T cell	0.47672	9.4106e-08	**
ZEB1	Immature B cell	0.448238	6.40456e-07	**
ZEB1	Immature dendritic cell	0.491133	3.33005e-08	**
ZEB1	Macrophage	0.546418	3.83879e-10	**
ZEB1	Mast cell	0.475571	1.02024e-07	**
ZEB1	MDSC	0.519687	3.67003e-09	**
ZEB1	Monocyte	0.461623	2.65757e-07	**
ZEB1	Natural killer cell	0.606769	1.05266e-12	**
ZEB1	Natural killer T cell	0.565336	6.86165e-11	**
ZEB1	Neutrophil	0.324706	0.000450006	**
ZEB1	Plasmacytoid dendritic cell	0.630882	6.91546e-14	**
ZEB1	Regulatory T cell	0.53973	6.87998e-10	**
ZEB1	T follicular helper cell	0.577618	2.11377e-11	**
ZEB1	Type 1 T helper cell	0.598606	2.514e-12	**
ZEB1	Type 17 T helper cell	0.260089	0.00540089	**
ZEB1	Type 2 T helper cell	-0.0705722	0.457616
MTDH	Activated B cell	0.2126	0.0237749	*
MTDH	Activated CD4 T cell	0.213614	0.0230992	*
MTDH	Activated CD8 T cell	0.121854	0.19854
MTDH	Activated dendritic cell	0.0966751	0.308378
MTDH	CD56bright natural killer cell	-0.214327	0.0226344	*
MTDH	CD56dim natural killer cell	-0.136417	0.149655
MTDH	Eosinophil	0.20848	0.0266959	*
MTDH	Gamma delta T cell	0.142745	0.131486
MTDH	Immature B cell	0.197117	0.0363792	*
MTDH	Immature dendritic cell	0.0915455	0.334871
MTDH	Macrophage	0.113013	0.233336
MTDH	Mast cell	0.207322	0.0275699	*
MTDH	MDSC	0.0725036	0.445368
MTDH	Monocyte	0.270448	0.00376594	**
MTDH	Natural killer cell	0.113084	0.233038
MTDH	Natural killer T cell	0.034998	0.712865
MTDH	Neutrophil	0.0275918	0.771741
MTDH	Plasmacytoid dendritic cell	0.0925121	0.329771
MTDH	Regulatory T cell	-0.0197014	0.835916
MTDH	T follicular helper cell	0.161804	0.0868631
MTDH	Type 1 T helper cell	0.0976606	0.303449
MTDH	Type 17 T helper cell	0.0872195	0.358305
MTDH	Type 2 T helper cell	0.0584991	0.538247
ALOX15	Activated B cell	0.518495	4.04053e-09	**
ALOX15	Activated CD4 T cell	0.0601403	0.526887
ALOX15	Activated CD8 T cell	0.257797	0.00583855	**
ALOX15	Activated dendritic cell	0.289078	0.00190053	**
ALOX15	CD56bright natural killer cell	0.198079	0.0354582	*
ALOX15	CD56dim natural killer cell	-0.109531	0.248145
ALOX15	Eosinophil	0.485649	4.97221e-08	**
ALOX15	Gamma delta T cell	0.0893359	0.346716
ALOX15	Immature B cell	0.493905	2.71176e-08	**
ALOX15	Immature dendritic cell	0.582091	1.35985e-11	**
ALOX15	Macrophage	0.133859	0.157513
ALOX15	Mast cell	0.375814	4.09681e-05	**
ALOX15	MDSC	0.255394	0.00633102	**
ALOX15	Monocyte	0.398442	1.2379e-05	**
ALOX15	Natural killer cell	0.161339	0.0877862
ALOX15	Natural killer T cell	-0.100542	0.289334
ALOX15	Neutrophil	0.167767	0.0757042
ALOX15	Plasmacytoid dendritic cell	0.47291	1.22866e-07	**
ALOX15	Regulatory T cell	0.137961	0.145055
ALOX15	T follicular helper cell	0.167874	0.0755155
ALOX15	Type 1 T helper cell	0.126815	0.180739
ALOX15	Type 17 T helper cell	0.0389178	0.682351
ALOX15	Type 2 T helper cell	-0.422762	3.09084e-06	**
ALOX12	Activated B cell	-0.157108	0.0965423
ALOX12	Activated CD4 T cell	-0.333572	0.00030564	**
ALOX12	Activated CD8 T cell	-0.204291	0.0299736	*
ALOX12	Activated dendritic cell	-0.151935	0.108169
ALOX12	CD56bright natural killer cell	-0.135127	0.15358
ALOX12	CD56dim natural killer cell	0.111485	0.239759
ALOX12	Eosinophil	-0.145798	0.12335
ALOX12	Gamma delta T cell	-0.0478515	0.614753
ALOX12	Immature B cell	-0.151616	0.108921
ALOX12	Immature dendritic cell	0.0614849	0.517672
ALOX12	Macrophage	-0.162733	0.0850442
ALOX12	Mast cell	-0.121133	0.201231
ALOX12	MDSC	-0.195837	0.0376356	*
ALOX12	Monocyte	-0.171844	0.0687619
ALOX12	Natural killer cell	-0.124086	0.190379
ALOX12	Natural killer T cell	-0.153399	0.104774
ALOX12	Neutrophil	0.135543	0.152304
ALOX12	Plasmacytoid dendritic cell	0.00515561	0.956779
ALOX12	Regulatory T cell	-0.167878	0.0755084
ALOX12	T follicular helper cell	-0.0762991	0.421845
ALOX12	Type 1 T helper cell	-0.207994	0.0270593	*
ALOX12	Type 17 T helper cell	-0.0719831	0.448651
ALOX12	Type 2 T helper cell	-0.20944	0.025989	*
IDH1	Activated B cell	-0.321879	0.000507865	**
IDH1	Activated CD4 T cell	0.113822	0.229986
IDH1	Activated CD8 T cell	-0.0601538	0.526794
IDH1	Activated dendritic cell	-0.23531	0.0121109	*
IDH1	CD56bright natural killer cell	-0.336428	0.00026915	**
IDH1	CD56dim natural killer cell	0.0110306	0.907687
IDH1	Eosinophil	-0.322371	0.000497327	**
IDH1	Gamma delta T cell	-0.102064	0.282061
IDH1	Immature B cell	-0.311168	0.000794611	**
IDH1	Immature dendritic cell	-0.281211	0.00255111	**
IDH1	Macrophage	-0.088057	0.353691
IDH1	Mast cell	-0.128484	0.17502
IDH1	MDSC	-0.142832	0.131251
IDH1	Monocyte	-0.274669	0.00323835	**
IDH1	Natural killer cell	-0.164186	0.0822588
IDH1	Natural killer T cell	-0.11168	0.238929
IDH1	Neutrophil	-0.0837745	0.377676
IDH1	Plasmacytoid dendritic cell	-0.348046	0.000158441	**
IDH1	Regulatory T cell	-0.0975783	0.303858
IDH1	T follicular helper cell	-0.159397	0.0917231
IDH1	Type 1 T helper cell	-0.134893	0.154299
IDH1	Type 17 T helper cell	0.0167906	0.85989
IDH1	Type 2 T helper cell	0.270011	0.00382472	**
EGFR	Activated B cell	-0.432874	1.68018e-06	**
EGFR	Activated CD4 T cell	-0.103133	0.277025
EGFR	Activated CD8 T cell	-0.289971	0.00183708	**
EGFR	Activated dendritic cell	-0.11371	0.230449
EGFR	CD56bright natural killer cell	0.152728	0.10632
EGFR	CD56dim natural killer cell	0.0941308	0.321343
EGFR	Eosinophil	-0.443919	8.43938e-07	**
EGFR	Gamma delta T cell	-0.261687	0.0051133	**
EGFR	Immature B cell	-0.434384	1.53147e-06	**
EGFR	Immature dendritic cell	-0.329988	0.000357877	**
EGFR	Macrophage	-0.242477	0.00966347	**
EGFR	Mast cell	-0.190449	0.0433295	*
EGFR	MDSC	-0.236844	0.0115455	*
EGFR	Monocyte	-0.386026	2.41323e-05	**
EGFR	Natural killer cell	-0.194065	0.0394348	*
EGFR	Natural killer T cell	0.032553	0.732136
EGFR	Neutrophil	0.0698231	0.462415
EGFR	Plasmacytoid dendritic cell	-0.152761	0.106243
EGFR	Regulatory T cell	-0.135858	0.151346
EGFR	T follicular helper cell	-0.24563	0.00873241	**
EGFR	Type 1 T helper cell	-0.0802472	0.398156
EGFR	Type 17 T helper cell	-0.0204708	0.829603
EGFR	Type 2 T helper cell	0.448183	6.42736e-07	**
KEAP1	Activated B cell	-0.501371	1.54562e-08	**
KEAP1	Activated CD4 T cell	-0.0332669	0.726491
KEAP1	Activated CD8 T cell	-0.148904	0.115475
KEAP1	Activated dendritic cell	-0.350477	0.00014144	**
KEAP1	CD56bright natural killer cell	-0.130252	0.169112
KEAP1	CD56dim natural killer cell	0.0822406	0.386503
KEAP1	Eosinophil	-0.496794	2.18514e-08	**
KEAP1	Gamma delta T cell	-0.197287	0.0362156	*
KEAP1	Immature B cell	-0.49509	2.48256e-08	**
KEAP1	Immature dendritic cell	-0.454546	4.25092e-07	**
KEAP1	Macrophage	-0.280742	0.00259565	**
KEAP1	Mast cell	-0.329173	0.000370853	**
KEAP1	MDSC	-0.27412	0.00330303	**
KEAP1	Monocyte	-0.420964	3.43761e-06	**
KEAP1	Natural killer cell	-0.327007	0.000407486	**
KEAP1	Natural killer T cell	-0.1417	0.134366
KEAP1	Neutrophil	-0.217652	0.0205699	*
KEAP1	Plasmacytoid dendritic cell	-0.466646	1.89178e-07	**
KEAP1	Regulatory T cell	-0.219919	0.0192575	*
KEAP1	T follicular helper cell	-0.308249	0.000895146	**
KEAP1	Type 1 T helper cell	-0.304898	0.00102482	**
KEAP1	Type 17 T helper cell	0.029871	0.753466
KEAP1	Type 2 T helper cell	0.241305	0.010031	*
ATM	Activated B cell	0.786338	5.81003e-25	**
ATM	Activated CD4 T cell	0.408493	7.0686e-06	**
ATM	Activated CD8 T cell	0.53807	7.93638e-10	**
ATM	Activated dendritic cell	0.510896	7.39556e-09	**
ATM	CD56bright natural killer cell	0.192642	0.040931	*
ATM	CD56dim natural killer cell	0.00857215	0.928198
ATM	Eosinophil	0.711539	1.02391e-18	**
ATM	Gamma delta T cell	0.1329	0.160537
ATM	Immature B cell	0.790945	1.98796e-25	**
ATM	Immature dendritic cell	0.415063	4.85228e-06	**
ATM	Macrophage	0.355157	0.000113378	**
ATM	Mast cell	0.33785	0.000252527	**
ATM	MDSC	0.501898	1.48469e-08	**
ATM	Monocyte	0.684334	6.49618e-17	**
ATM	Natural killer cell	0.307048	0.000939771	**
ATM	Natural killer T cell	0.21633	0.0213703	*
ATM	Neutrophil	0.0174957	0.85407
ATM	Plasmacytoid dendritic cell	0.49399	2.69466e-08	**
ATM	Regulatory T cell	0.392023	1.75391e-05	**
ATM	T follicular helper cell	0.43945	1.1184e-06	**
ATM	Type 1 T helper cell	0.452172	4.96469e-07	**
ATM	Type 17 T helper cell	0.10367	0.274515
ATM	Type 2 T helper cell	-0.378737	3.52726e-05	**
CARS	Activated B cell	-0.0702233	0.459848
CARS	Activated CD4 T cell	-0.0427951	0.652662
CARS	Activated CD8 T cell	-0.100961	0.287322
CARS	Activated dendritic cell	-0.22724	0.0154996	*
CARS	CD56bright natural killer cell	-0.175595	0.0628387
CARS	CD56dim natural killer cell	-0.00573944	0.95189
CARS	Eosinophil	-0.177602	0.0598447
CARS	Gamma delta T cell	-0.331754	0.000331192	**
CARS	Immature B cell	-0.0851778	0.36971
CARS	Immature dendritic cell	-0.187692	0.0465093	*
CARS	Macrophage	-0.257204	0.00595683	**
CARS	Mast cell	-0.261385	0.00516661	**
CARS	MDSC	-0.190376	0.0434104	*
CARS	Monocyte	-0.174541	0.0644597
CARS	Natural killer cell	-0.365276	6.94575e-05	**
CARS	Natural killer T cell	-0.329544	0.000364896	**
CARS	Neutrophil	-0.0867217	0.361065
CARS	Plasmacytoid dendritic cell	-0.285649	0.00216291	**
CARS	Regulatory T cell	-0.219248	0.019638	*
CARS	T follicular helper cell	-0.272997	0.0034389	**
CARS	Type 1 T helper cell	-0.287213	0.00203946	**
CARS	Type 17 T helper cell	-0.0563527	0.553282
CARS	Type 2 T helper cell	-0.153364	0.104854
ELAVL1	Activated B cell	-0.471726	1.33401e-07	**
ELAVL1	Activated CD4 T cell	-0.100486	0.289606
ELAVL1	Activated CD8 T cell	-0.375968	4.06472e-05	**
ELAVL1	Activated dendritic cell	-0.554756	1.82129e-10	**
ELAVL1	CD56bright natural killer cell	-0.302555	0.00112541	**
ELAVL1	CD56dim natural killer cell	-0.238368	0.011007	*
ELAVL1	Eosinophil	-0.499912	1.72686e-08	**
ELAVL1	Gamma delta T cell	-0.278814	0.00278595	**
ELAVL1	Immature B cell	-0.496452	2.2419e-08	**
ELAVL1	Immature dendritic cell	-0.541056	6.13497e-10	**
ELAVL1	Macrophage	-0.370669	5.31338e-05	**
ELAVL1	Mast cell	-0.446169	7.31294e-07	**
ELAVL1	MDSC	-0.4732	1.20417e-07	**
ELAVL1	Monocyte	-0.44308	8.9002e-07	**
ELAVL1	Natural killer cell	-0.375223	4.22199e-05	**
ELAVL1	Natural killer T cell	-0.357186	0.000102904	**
ELAVL1	Neutrophil	-0.392399	1.71888e-05	**
ELAVL1	Plasmacytoid dendritic cell	-0.57858	1.92343e-11	**
ELAVL1	Regulatory T cell	-0.442664	9.13737e-07	**
ELAVL1	T follicular helper cell	-0.463458	2.34874e-07	**
ELAVL1	Type 1 T helper cell	-0.4429	9.00205e-07	**
ELAVL1	Type 17 T helper cell	-0.218619	0.0200012	*
ELAVL1	Type 2 T helper cell	0.286056	0.00213014	**
PANX1	Activated B cell	-0.301094	0.00119266	**
PANX1	Activated CD4 T cell	-0.124203	0.189959
PANX1	Activated CD8 T cell	-0.108493	0.252683
PANX1	Activated dendritic cell	0.0316902	0.738976
PANX1	CD56bright natural killer cell	0.212023	0.0241666	*
PANX1	CD56dim natural killer cell	0.0684986	0.47097
PANX1	Eosinophil	-0.166047	0.0787975
PANX1	Gamma delta T cell	0.223872	0.0171412	*
PANX1	Immature B cell	-0.255093	0.00639528	**
PANX1	Immature dendritic cell	0.0285325	0.764183
PANX1	Macrophage	0.110164	0.245405
PANX1	Mast cell	0.111347	0.240344
PANX1	MDSC	-0.00430422	0.963911
PANX1	Monocyte	-0.0758967	0.424304
PANX1	Natural killer cell	0.276083	0.00307713	**
PANX1	Natural killer T cell	0.380442	3.23012e-05	**
PANX1	Neutrophil	0.247527	0.0082113	**
PANX1	Plasmacytoid dendritic cell	0.205291	0.0291614	*
PANX1	Regulatory T cell	0.130519	0.168232
PANX1	T follicular helper cell	0.199229	0.034384	*
PANX1	Type 1 T helper cell	0.138595	0.143201
PANX1	Type 17 T helper cell	0.136888	0.14824
PANX1	Type 2 T helper cell	0.220772	0.0187824	*
SAT1	Activated B cell	0.420391	3.55555e-06	**
SAT1	Activated CD4 T cell	0.0963307	0.310112
SAT1	Activated CD8 T cell	0.199115	0.0344893	*
SAT1	Activated dendritic cell	0.26392	0.00473433	**
SAT1	CD56bright natural killer cell	0.154153	0.103056
SAT1	CD56dim natural killer cell	-0.14755	0.118858
SAT1	Eosinophil	0.457807	3.42806e-07	**
SAT1	Gamma delta T cell	0.269951	0.00383293	**
SAT1	Immature B cell	0.4243	2.82066e-06	**
SAT1	Immature dendritic cell	0.565382	6.83147e-11	**
SAT1	Macrophage	0.347677	0.00016118	**
SAT1	Mast cell	0.409632	6.62577e-06	**
SAT1	MDSC	0.331353	0.000337078	**
SAT1	Monocyte	0.418015	4.08716e-06	**
SAT1	Natural killer cell	0.277417	0.00293169	**
SAT1	Natural killer T cell	0.0840992	0.375824
SAT1	Neutrophil	0.37196	4.97986e-05	**
SAT1	Plasmacytoid dendritic cell	0.491644	3.20674e-08	**
SAT1	Regulatory T cell	0.235429	0.0120661	*
SAT1	T follicular helper cell	0.327917	0.000391708	**
SAT1	Type 1 T helper cell	0.233812	0.0126856	*
SAT1	Type 17 T helper cell	0.112715	0.234577
SAT1	Type 2 T helper cell	-0.287442	0.00202185	**
PGD	Activated B cell	-0.217397	0.0207224	*
PGD	Activated CD4 T cell	0.00218054	0.981713
PGD	Activated CD8 T cell	-0.103467	0.275464
PGD	Activated dendritic cell	-0.177695	0.0597094
PGD	CD56bright natural killer cell	-0.0476125	0.616523
PGD	CD56dim natural killer cell	0.0315979	0.739709
PGD	Eosinophil	-0.225979	0.0160975	*
PGD	Gamma delta T cell	0.00642104	0.946185
PGD	Immature B cell	-0.253722	0.0066953	**
PGD	Immature dendritic cell	-0.238282	0.0110368	*
PGD	Macrophage	-0.134546	0.155372
PGD	Mast cell	-0.14863	0.116152
PGD	MDSC	-0.155171	0.100774
PGD	Monocyte	-0.159259	0.092009
PGD	Natural killer cell	-0.0463238	0.626106
PGD	Natural killer T cell	-0.0651255	0.493139
PGD	Neutrophil	-0.0549378	0.563304
PGD	Plasmacytoid dendritic cell	-0.191128	0.0425738	*
PGD	Regulatory T cell	-0.116232	0.220204
PGD	T follicular helper cell	-0.14536	0.124493
PGD	Type 1 T helper cell	-0.17971	0.056827
PGD	Type 17 T helper cell	0.0307997	0.746058
PGD	Type 2 T helper cell	0.181767	0.0540039
CS	Activated B cell	-0.497732	2.03621e-08	**
CS	Activated CD4 T cell	-0.119134	0.208821
CS	Activated CD8 T cell	-0.412171	5.73167e-06	**
CS	Activated dendritic cell	-0.529288	1.66847e-09	**
CS	CD56bright natural killer cell	-0.412131	5.74479e-06	**
CS	CD56dim natural killer cell	-0.0800933	0.399065
CS	Eosinophil	-0.527255	1.97562e-09	**
CS	Gamma delta T cell	-0.327119	0.000405512	**
CS	Immature B cell	-0.523443	2.70391e-09	**
CS	Immature dendritic cell	-0.465262	2.07866e-07	**
CS	Macrophage	-0.497155	2.1266e-08	**
CS	Mast cell	-0.395654	1.44142e-05	**
CS	MDSC	-0.511474	7.0668e-09	**
CS	Monocyte	-0.511372	7.12359e-09	**
CS	Natural killer cell	-0.365241	6.95782e-05	**
CS	Natural killer T cell	-0.367349	6.26953e-05	**
CS	Neutrophil	-0.189683	0.044194	*
CS	Plasmacytoid dendritic cell	-0.560919	1.03572e-10	**
CS	Regulatory T cell	-0.422333	3.17046e-06	**
CS	T follicular helper cell	-0.420248	3.58567e-06	**
CS	Type 1 T helper cell	-0.474809	1.07616e-07	**
CS	Type 17 T helper cell	-0.113617	0.23083
CS	Type 2 T helper cell	0.301285	0.00118364	**
SOCS1	Activated B cell	-0.170944	0.070248
SOCS1	Activated CD4 T cell	0.257714	0.00585511	**
SOCS1	Activated CD8 T cell	0.0956445	0.313587
SOCS1	Activated dendritic cell	0.0191353	0.840567
SOCS1	CD56bright natural killer cell	0.0913894	0.335699
SOCS1	CD56dim natural killer cell	0.145405	0.124375
SOCS1	Eosinophil	-0.196096	0.0373785	*
SOCS1	Gamma delta T cell	-0.0794412	0.402927
SOCS1	Immature B cell	-0.14413	0.127746
SOCS1	Immature dendritic cell	-0.275089	0.00318972	**
SOCS1	Macrophage	0.0724765	0.445539
SOCS1	Mast cell	-0.079278	0.403897
SOCS1	MDSC	0.111925	0.237896
SOCS1	Monocyte	-0.123596	0.19215
SOCS1	Natural killer cell	-0.0931138	0.326622
SOCS1	Natural killer T cell	0.13471	0.154866
SOCS1	Neutrophil	-0.0228789	0.809916
SOCS1	Plasmacytoid dendritic cell	-0.273568	0.00336924	**
SOCS1	Regulatory T cell	0.161213	0.0880376
SOCS1	T follicular helper cell	-0.0469899	0.621145
SOCS1	Type 1 T helper cell	0.0929108	0.327682
SOCS1	Type 17 T helper cell	0.0571446	0.547711
SOCS1	Type 2 T helper cell	0.370927	5.24524e-05	**
ATP5G3	Activated B cell	-0.394911	1.50076e-05	**
ATP5G3	Activated CD4 T cell	0.112271	0.23644
ATP5G3	Activated CD8 T cell	-0.0192955	0.839251
ATP5G3	Activated dendritic cell	-0.33857	0.000244474	**
ATP5G3	CD56bright natural killer cell	-0.16368	0.0832212
ATP5G3	CD56dim natural killer cell	0.098463	0.299474
ATP5G3	Eosinophil	-0.438791	1.1654e-06	**
ATP5G3	Gamma delta T cell	-0.145176	0.124975
ATP5G3	Immature B cell	-0.392761	1.68564e-05	**
ATP5G3	Immature dendritic cell	-0.392896	1.6735e-05	**
ATP5G3	Macrophage	-0.276772	0.00300124	**
ATP5G3	Mast cell	-0.330381	0.000351775	**
ATP5G3	MDSC	-0.219688	0.0193878	*
ATP5G3	Monocyte	-0.394297	1.55155e-05	**
ATP5G3	Natural killer cell	-0.307355	0.000928194	**
ATP5G3	Natural killer T cell	-0.114847	0.225788
ATP5G3	Neutrophil	-0.19078	0.0429593	*
ATP5G3	Plasmacytoid dendritic cell	-0.506774	1.02026e-08	**
ATP5G3	Regulatory T cell	-0.206101	0.0285175	*
ATP5G3	T follicular helper cell	-0.253483	0.00674881	**
ATP5G3	Type 1 T helper cell	-0.265101	0.00454415	**
ATP5G3	Type 17 T helper cell	-0.0536651	0.572392
ATP5G3	Type 2 T helper cell	0.317464	0.000612	**
MYB	Activated B cell	-0.506843	1.01478e-08	**
MYB	Activated CD4 T cell	-0.359827	9.06139e-05	**
MYB	Activated CD8 T cell	-0.589334	6.56237e-12	**
MYB	Activated dendritic cell	-0.543652	4.89433e-10	**
MYB	CD56bright natural killer cell	-0.280425	0.00262614	**
MYB	CD56dim natural killer cell	-0.44287	9.01938e-07	**
MYB	Eosinophil	-0.450574	5.5078e-07	**
MYB	Gamma delta T cell	-0.317461	0.000612058	**
MYB	Immature B cell	-0.529101	1.69468e-09	**
MYB	Immature dendritic cell	-0.474443	1.10412e-07	**
MYB	Macrophage	-0.309478	0.000851452	**
MYB	Mast cell	-0.500385	1.66595e-08	**
MYB	MDSC	-0.51874	3.96151e-09	**
MYB	Monocyte	-0.480684	7.10561e-08	**
MYB	Natural killer cell	-0.290598	0.00179368	**
MYB	Natural killer T cell	-0.420331	3.5681e-06	**
MYB	Neutrophil	-0.198312	0.0352387	*
MYB	Plasmacytoid dendritic cell	-0.43131	1.84877e-06	**
MYB	Regulatory T cell	-0.424437	2.79779e-06	**
MYB	T follicular helper cell	-0.473011	1.22008e-07	**
MYB	Type 1 T helper cell	-0.409995	6.49051e-06	**
MYB	Type 17 T helper cell	-0.404459	8.87051e-06	**
MYB	Type 2 T helper cell	0.211804	0.0243167	*
ALOX5	Activated B cell	0.536854	8.80813e-10	**
ALOX5	Activated CD4 T cell	0.492733	2.95849e-08	**
ALOX5	Activated CD8 T cell	0.572665	3.41834e-11	**
ALOX5	Activated dendritic cell	0.673173	3.13937e-16	**
ALOX5	CD56bright natural killer cell	0.413703	5.24878e-06	**
ALOX5	CD56dim natural killer cell	0.239733	0.0105435	*
ALOX5	Eosinophil	0.646348	1.06061e-14	**
ALOX5	Gamma delta T cell	0.436018	1.38453e-06	**
ALOX5	Immature B cell	0.605199	1.24691e-12	**
ALOX5	Immature dendritic cell	0.520526	3.42917e-09	**
ALOX5	Macrophage	0.57628	2.40861e-11	**
ALOX5	Mast cell	0.4959	2.33656e-08	**
ALOX5	MDSC	0.686228	4.93781e-17	**
ALOX5	Monocyte	0.698986	7.36164e-18	**
ALOX5	Natural killer cell	0.513762	5.89834e-09	**
ALOX5	Natural killer T cell	0.4945	2.59418e-08	**
ALOX5	Neutrophil	0.26106	0.00522447	**
ALOX5	Plasmacytoid dendritic cell	0.559624	1.16719e-10	**
ALOX5	Regulatory T cell	0.67648	1.98243e-16	**
ALOX5	T follicular helper cell	0.574792	2.78353e-11	**
ALOX5	Type 1 T helper cell	0.611825	6.06231e-13	**
ALOX5	Type 17 T helper cell	0.442501	9.23236e-07	**
ALOX5	Type 2 T helper cell	-0.0424569	0.655231
MIOX	Activated B cell	-0.204284	0.0299789	*
MIOX	Activated CD4 T cell	0.0382054	0.687861
MIOX	Activated CD8 T cell	-0.0406179	0.66927
MIOX	Activated dendritic cell	-0.0918584	0.333215
MIOX	CD56bright natural killer cell	-0.0219051	0.817864
MIOX	CD56dim natural killer cell	0.0609894	0.521058
MIOX	Eosinophil	-0.156526	0.097799
MIOX	Gamma delta T cell	-0.0679864	0.474301
MIOX	Immature B cell	-0.200755	0.0330004	*
MIOX	Immature dendritic cell	-0.161696	0.0870784
MIOX	Macrophage	-0.0256622	0.787311
MIOX	Mast cell	-0.197922	0.0356073	*
MIOX	MDSC	-0.0259201	0.785224
MIOX	Monocyte	-0.167622	0.0759621
MIOX	Natural killer cell	-0.0926536	0.329029
MIOX	Natural killer T cell	0.0127274	0.893564
MIOX	Neutrophil	-0.085436	0.368255
MIOX	Plasmacytoid dendritic cell	-0.167213	0.0766903
MIOX	Regulatory T cell	0.0034473	0.971093
MIOX	T follicular helper cell	-0.150803	0.110853
MIOX	Type 1 T helper cell	-0.0068569	0.942538
MIOX	Type 17 T helper cell	0.0935077	0.324571
MIOX	Type 2 T helper cell	0.16275	0.0850106
TAZ	Activated B cell	0.106051	0.263585
TAZ	Activated CD4 T cell	-0.121344	0.200441
TAZ	Activated CD8 T cell	0.0418231	0.660056
TAZ	Activated dendritic cell	-0.0704166	0.45861
TAZ	CD56bright natural killer cell	-0.176038	0.0621675
TAZ	CD56dim natural killer cell	0.196732	0.0367529	*
TAZ	Eosinophil	0.0853278	0.368865
TAZ	Gamma delta T cell	-0.144055	0.127946
TAZ	Immature B cell	0.0784481	0.408852
TAZ	Immature dendritic cell	-0.102455	0.280211
TAZ	Macrophage	-0.168447	0.074509
TAZ	Mast cell	-0.263884	0.00474027	**
TAZ	MDSC	-0.0834639	0.379454
TAZ	Monocyte	0.0196079	0.836684
TAZ	Natural killer cell	-0.207554	0.0273923	*
TAZ	Natural killer T cell	-0.148801	0.115729
TAZ	Neutrophil	-0.293944	0.00157746	**
TAZ	Plasmacytoid dendritic cell	-0.152844	0.106051
TAZ	Regulatory T cell	-0.0974843	0.304326
TAZ	T follicular helper cell	-0.116634	0.218604
TAZ	Type 1 T helper cell	-0.234853	0.0122838	*
TAZ	Type 17 T helper cell	-0.0280866	0.767762
TAZ	Type 2 T helper cell	-0.445757	7.50792e-07	**
VDAC2	Activated B cell	-0.372058	4.95525e-05	**
VDAC2	Activated CD4 T cell	-0.00485321	0.959312
VDAC2	Activated CD8 T cell	-0.171507	0.069316
VDAC2	Activated dendritic cell	-0.280648	0.0026046	**
VDAC2	CD56bright natural killer cell	-0.213795	0.0229801	*
VDAC2	CD56dim natural killer cell	0.132284	0.162502
VDAC2	Eosinophil	-0.349943	0.000145021	**
VDAC2	Gamma delta T cell	-0.138732	0.142801
VDAC2	Immature B cell	-0.368312	5.97694e-05	**
VDAC2	Immature dendritic cell	-0.297859	0.00135469	**
VDAC2	Macrophage	-0.294475	0.0015454	**
VDAC2	Mast cell	-0.322452	0.000495598	**
VDAC2	MDSC	-0.268213	0.00407537	**
VDAC2	Monocyte	-0.383494	2.7561e-05	**
VDAC2	Natural killer cell	-0.298366	0.00132804	**
VDAC2	Natural killer T cell	-0.12762	0.177965
VDAC2	Neutrophil	-0.0859949	0.365119
VDAC2	Plasmacytoid dendritic cell	-0.455746	3.92848e-07	**
VDAC2	Regulatory T cell	-0.160705	0.0890573
VDAC2	T follicular helper cell	-0.273297	0.00340207	**
VDAC2	Type 1 T helper cell	-0.325705	0.00043107	**
VDAC2	Type 17 T helper cell	0.0316549	0.739256
VDAC2	Type 2 T helper cell	0.144263	0.127391
ATG7	Activated B cell	0.519489	3.72918e-09	**
ATG7	Activated CD4 T cell	0.459681	3.0263e-07	**
ATG7	Activated CD8 T cell	0.565985	6.45541e-11	**
ATG7	Activated dendritic cell	0.551702	2.39908e-10	**
ATG7	CD56bright natural killer cell	0.348959	0.000151843	**
ATG7	CD56dim natural killer cell	0.102295	0.280966
ATG7	Eosinophil	0.622439	1.84262e-13	**
ATG7	Gamma delta T cell	0.523219	2.7539e-09	**
ATG7	Immature B cell	0.558109	1.3416e-10	**
ATG7	Immature dendritic cell	0.442412	9.28403e-07	**
ATG7	Macrophage	0.61529	4.12998e-13	**
ATG7	Mast cell	0.486145	4.79645e-08	**
ATG7	MDSC	0.645625	1.16056e-14	**
ATG7	Monocyte	0.657284	2.63645e-15	**
ATG7	Natural killer cell	0.615772	3.91363e-13	**
ATG7	Natural killer T cell	0.489432	3.77376e-08	**
ATG7	Neutrophil	0.278107	0.00285885	**
ATG7	Plasmacytoid dendritic cell	0.520055	3.56256e-09	**
ATG7	Regulatory T cell	0.624741	1.41478e-13	**
ATG7	T follicular helper cell	0.623048	1.71858e-13	**
ATG7	Type 1 T helper cell	0.573016	3.3047e-11	**
ATG7	Type 17 T helper cell	0.440087	1.07468e-06	**
ATG7	Type 2 T helper cell	0.0148999	0.875532
ATG5	Activated B cell	-0.114633	0.22666
ATG5	Activated CD4 T cell	0.0567513	0.550475
ATG5	Activated CD8 T cell	-0.130191	0.169313
ATG5	Activated dendritic cell	-0.211985	0.0241922	*
ATG5	CD56bright natural killer cell	-0.201531	0.0323142	*
ATG5	CD56dim natural killer cell	-0.248002	0.0080851	**
ATG5	Eosinophil	-0.181034	0.0549959
ATG5	Gamma delta T cell	-0.164001	0.0826087
ATG5	Immature B cell	-0.1379	0.145237
ATG5	Immature dendritic cell	-0.127144	0.179601
ATG5	Macrophage	-0.155936	0.0990877
ATG5	Mast cell	-0.135576	0.152205
ATG5	MDSC	-0.187251	0.0470363	*
ATG5	Monocyte	-0.26845	0.00404148	**
ATG5	Natural killer cell	-0.271191	0.00366783	**
ATG5	Natural killer T cell	-0.211431	0.0245739	*
ATG5	Neutrophil	-0.0108868	0.908885
ATG5	Plasmacytoid dendritic cell	-0.294932	0.00151831	**
ATG5	Regulatory T cell	-0.193965	0.039538	*
ATG5	T follicular helper cell	-0.217705	0.0205385	*
ATG5	Type 1 T helper cell	-0.191583	0.0420745	*
ATG5	Type 17 T helper cell	-0.128025	0.176581
ATG5	Type 2 T helper cell	0.142807	0.131317
ACSL4	Activated B cell	0.203244	0.0308437	*
ACSL4	Activated CD4 T cell	0.108772	0.251457
ACSL4	Activated CD8 T cell	0.0913839	0.335729
ACSL4	Activated dendritic cell	0.345297	0.00017994	**
ACSL4	CD56bright natural killer cell	0.207284	0.0275986	*
ACSL4	CD56dim natural killer cell	-0.142529	0.132077
ACSL4	Eosinophil	0.307218	0.000933356	**
ACSL4	Gamma delta T cell	0.457236	3.5603e-07	**
ACSL4	Immature B cell	0.258589	0.00568401	**
ACSL4	Immature dendritic cell	0.269973	0.00382991	**
ACSL4	Macrophage	0.427224	2.36771e-06	**
ACSL4	Mast cell	0.336439	0.000269018	**
ACSL4	MDSC	0.311651	0.000779007	**
ACSL4	Monocyte	0.350866	0.000138882	**
ACSL4	Natural killer cell	0.517085	4.52513e-09	**
ACSL4	Natural killer T cell	0.420456	3.5419e-06	**
ACSL4	Neutrophil	0.242991	0.00950598	**
ACSL4	Plasmacytoid dendritic cell	0.526323	2.13383e-09	**
ACSL4	Regulatory T cell	0.370624	5.32542e-05	**
ACSL4	T follicular helper cell	0.405182	8.51845e-06	**
ACSL4	Type 1 T helper cell	0.470268	1.47556e-07	**
ACSL4	Type 17 T helper cell	0.144788	0.125998
ACSL4	Type 2 T helper cell	0.226157	0.0160118	*
ANO6	Activated B cell	-0.356664	0.000105509	**
ANO6	Activated CD4 T cell	-0.156409	0.0980533
ANO6	Activated CD8 T cell	-0.279395	0.00272729	**
ANO6	Activated dendritic cell	-0.136053	0.150754
ANO6	CD56bright natural killer cell	-0.105091	0.267957
ANO6	CD56dim natural killer cell	-0.162112	0.0862563
ANO6	Eosinophil	-0.263671	0.00477527	**
ANO6	Gamma delta T cell	0.0980387	0.301572
ANO6	Immature B cell	-0.334006	0.000299811	**
ANO6	Immature dendritic cell	-0.0907617	0.339043
ANO6	Macrophage	-0.101359	0.285415
ANO6	Mast cell	-0.0476057	0.616573
ANO6	MDSC	-0.187761	0.0464282	*
ANO6	Monocyte	-0.226278	0.0159539	*
ANO6	Natural killer cell	0.129189	0.172645
ANO6	Natural killer T cell	0.0912019	0.336696
ANO6	Neutrophil	0.164483	0.081699
ANO6	Plasmacytoid dendritic cell	0.000394619	0.99669
ANO6	Regulatory T cell	-0.110874	0.242361
ANO6	T follicular helper cell	-0.0503953	0.59605
ANO6	Type 1 T helper cell	-0.0149933	0.874758
ANO6	Type 17 T helper cell	0.107094	0.258892
ANO6	Type 2 T helper cell	0.334795	0.000289492	**
SLC1A5	Activated B cell	-0.103091	0.277222
SLC1A5	Activated CD4 T cell	0.0859847	0.365177
SLC1A5	Activated CD8 T cell	0.025599	0.787822
SLC1A5	Activated dendritic cell	-0.281223	0.00255001	**
SLC1A5	CD56bright natural killer cell	-0.303421	0.00108724	**
SLC1A5	CD56dim natural killer cell	-0.110377	0.24449
SLC1A5	Eosinophil	-0.0708131	0.456078
SLC1A5	Gamma delta T cell	-0.0863421	0.363179
SLC1A5	Immature B cell	-0.115678	0.222425
SLC1A5	Immature dendritic cell	-0.0973932	0.304781
SLC1A5	Macrophage	-0.10673	0.260522
SLC1A5	Mast cell	-0.112764	0.234374
SLC1A5	MDSC	-0.123869	0.191163
SLC1A5	Monocyte	-0.0677854	0.475612
SLC1A5	Natural killer cell	-0.183828	0.0512918
SLC1A5	Natural killer T cell	-0.173559	0.0660008
SLC1A5	Neutrophil	-0.125313	0.185999
SLC1A5	Plasmacytoid dendritic cell	-0.283986	0.00230168	**
SLC1A5	Regulatory T cell	-0.185285	0.049443	*
SLC1A5	T follicular helper cell	-0.126916	0.180389
SLC1A5	Type 1 T helper cell	-0.209038	0.0262826	*
SLC1A5	Type 17 T helper cell	0.0985992	0.298803
SLC1A5	Type 2 T helper cell	-0.095513	0.314256
DPP4	Activated B cell	0.513986	5.79421e-09	**
DPP4	Activated CD4 T cell	0.400196	1.124e-05	**
DPP4	Activated CD8 T cell	0.575615	2.56977e-11	**
DPP4	Activated dendritic cell	0.625398	1.31146e-13	**
DPP4	CD56bright natural killer cell	0.347635	0.000161491	**
DPP4	CD56dim natural killer cell	0.0656056	0.489951
DPP4	Eosinophil	0.522021	3.03681e-09	**
DPP4	Gamma delta T cell	0.598561	2.52591e-12	**
DPP4	Immature B cell	0.538493	7.65326e-10	**
DPP4	Immature dendritic cell	0.519314	3.78251e-09	**
DPP4	Macrophage	0.603868	1.43844e-12	**
DPP4	Mast cell	0.659568	1.95714e-15	**
DPP4	MDSC	0.636888	3.38126e-14	**
DPP4	Monocyte	0.570914	4.04362e-11	**
DPP4	Natural killer cell	0.671669	3.86139e-16	**
DPP4	Natural killer T cell	0.591326	5.35363e-12	**
DPP4	Neutrophil	0.345543	0.000177911	**
DPP4	Plasmacytoid dendritic cell	0.674088	2.76589e-16	**
DPP4	Regulatory T cell	0.63491	4.28737e-14	**
DPP4	T follicular helper cell	0.701616	4.91116e-18	**
DPP4	Type 1 T helper cell	0.682309	8.69107e-17	**
DPP4	Type 17 T helper cell	0.435916	1.39335e-06	**
DPP4	Type 2 T helper cell	0.0501984	0.597488
GOT1	Activated B cell	-0.278852	0.00278206	**
GOT1	Activated CD4 T cell	0.0516805	0.586698
GOT1	Activated CD8 T cell	-0.0517864	0.585931
GOT1	Activated dendritic cell	-0.184547	0.0503723
GOT1	CD56bright natural killer cell	-0.10847	0.252785
GOT1	CD56dim natural killer cell	0.0106976	0.910462
GOT1	Eosinophil	-0.274601	0.00324629	**
GOT1	Gamma delta T cell	-0.0430948	0.65039
GOT1	Immature B cell	-0.270086	0.00381466	**
GOT1	Immature dendritic cell	-0.164234	0.0821687
GOT1	Macrophage	-0.256272	0.00614713	**
GOT1	Mast cell	-0.200983	0.032797	*
GOT1	MDSC	-0.159798	0.0909004
GOT1	Monocyte	-0.288979	0.00190765	**
GOT1	Natural killer cell	-0.157022	0.0967281
GOT1	Natural killer T cell	-0.0675541	0.477122
GOT1	Neutrophil	-0.0333722	0.72566
GOT1	Plasmacytoid dendritic cell	-0.316857	0.000627755	**
GOT1	Regulatory T cell	-0.0633096	0.505298
GOT1	T follicular helper cell	-0.134826	0.154507
GOT1	Type 1 T helper cell	-0.162633	0.0852376
GOT1	Type 17 T helper cell	0.0642457	0.499011
GOT1	Type 2 T helper cell	0.207551	0.027395	*
RPL8	Activated B cell	-0.195772	0.0377004	*
RPL8	Activated CD4 T cell	-0.0650366	0.493731
RPL8	Activated CD8 T cell	-0.160218	0.0900417
RPL8	Activated dendritic cell	-0.278627	0.00280506	**
RPL8	CD56bright natural killer cell	-0.323241	0.000479185	**
RPL8	CD56dim natural killer cell	0.0611701	0.519822
RPL8	Eosinophil	-0.257598	0.00587817	**
RPL8	Gamma delta T cell	-0.32218	0.000501382	**
RPL8	Immature B cell	-0.241739	0.00989373	**
RPL8	Immature dendritic cell	-0.39778	1.28361e-05	**
RPL8	Macrophage	-0.33616	0.000272395	**
RPL8	Mast cell	-0.330085	0.000356356	**
RPL8	MDSC	-0.318301	0.000590866	**
RPL8	Monocyte	-0.270322	0.00378286	**
RPL8	Natural killer cell	-0.385494	2.48171e-05	**
RPL8	Natural killer T cell	-0.359758	9.09166e-05	**
RPL8	Neutrophil	-0.336212	0.000271761	**
RPL8	Plasmacytoid dendritic cell	-0.544853	4.40544e-10	**
RPL8	Regulatory T cell	-0.291329	0.00174428	**
RPL8	T follicular helper cell	-0.349761	0.000146259	**
RPL8	Type 1 T helper cell	-0.386304	2.37808e-05	**
RPL8	Type 17 T helper cell	-0.21595	0.0216057	*
RPL8	Type 2 T helper cell	0.0377806	0.691154
PTGS2	Activated B cell	-0.0829744	0.382265
PTGS2	Activated CD4 T cell	0.23732	0.0113749	*
PTGS2	Activated CD8 T cell	0.171497	0.0693319
PTGS2	Activated dendritic cell	0.133172	0.159672
PTGS2	CD56bright natural killer cell	-0.000108009	0.999094
PTGS2	CD56dim natural killer cell	0.355483	0.000111631	**
PTGS2	Eosinophil	-0.0740382	0.43577
PTGS2	Gamma delta T cell	-0.0429677	0.651353
PTGS2	Immature B cell	-0.0626156	0.509986
PTGS2	Immature dendritic cell	-0.0998889	0.292496
PTGS2	Macrophage	-0.00312216	0.973818
PTGS2	Mast cell	0.233013	0.0130022	*
PTGS2	MDSC	0.109587	0.247903
PTGS2	Monocyte	-0.047074	0.62052
PTGS2	Natural killer cell	-0.083897	0.376977
PTGS2	Natural killer T cell	0.148813	0.115699
PTGS2	Neutrophil	0.0651123	0.493227
PTGS2	Plasmacytoid dendritic cell	-0.0997543	0.29315
PTGS2	Regulatory T cell	0.126803	0.180781
PTGS2	T follicular helper cell	-0.0331893	0.727104
PTGS2	Type 1 T helper cell	0.0367848	0.698896
PTGS2	Type 17 T helper cell	0.233226	0.012917	*
PTGS2	Type 2 T helper cell	0.231969	0.0134259	*
CHC1	Activated B cell	-0.0586337	0.53731
CHC1	Activated CD4 T cell	0.122827	0.194954
CHC1	Activated CD8 T cell	0.0507463	0.593489
CHC1	Activated dendritic cell	-0.04476	0.637819
CHC1	CD56bright natural killer cell	-0.0909226	0.338184
CHC1	CD56dim natural killer cell	0.0805269	0.396508
CHC1	Eosinophil	0.0506538	0.594163
CHC1	Gamma delta T cell	0.115442	0.223377
CHC1	Immature B cell	-0.0416457	0.66141
CHC1	Immature dendritic cell	-0.00279582	0.976554
CHC1	Macrophage	0.0852261	0.369438
CHC1	Mast cell	0.0654367	0.491071
CHC1	MDSC	0.0740549	0.435666
CHC1	Monocyte	0.0255109	0.788536
CHC1	Natural killer cell	-0.00127143	0.989336
CHC1	Natural killer T cell	0.0436941	0.645854
CHC1	Neutrophil	0.159901	0.0906884
CHC1	Plasmacytoid dendritic cell	-0.045781	0.630161
CHC1	Regulatory T cell	0.0179072	0.850677
CHC1	T follicular helper cell	0.0105093	0.912031
CHC1	Type 1 T helper cell	-0.0130636	0.89077
CHC1	Type 17 T helper cell	0.136066	0.150716
CHC1	Type 2 T helper cell	0.0421811	0.657329
FTH1	Activated B cell	-0.217798	0.0204834	*
FTH1	Activated CD4 T cell	-0.107371	0.257653
FTH1	Activated CD8 T cell	-0.1212	0.200977
FTH1	Activated dendritic cell	-0.0480728	0.613115
FTH1	CD56bright natural killer cell	-0.09719	0.305796
FTH1	CD56dim natural killer cell	0.0761154	0.422966
FTH1	Eosinophil	-0.134417	0.155774
FTH1	Gamma delta T cell	0.188293	0.0457997	*
FTH1	Immature B cell	-0.206814	0.0279608	*
FTH1	Immature dendritic cell	-0.0522341	0.582691
FTH1	Macrophage	0.227012	0.0156061	*
FTH1	Mast cell	0.0556784	0.558048
FTH1	MDSC	0.0107041	0.910408
FTH1	Monocyte	-0.057826	0.542939
FTH1	Natural killer cell	0.118373	0.211763
FTH1	Natural killer T cell	0.117256	0.216137
FTH1	Neutrophil	0.137369	0.146807
FTH1	Plasmacytoid dendritic cell	-0.1165	0.219134
FTH1	Regulatory T cell	0.108283	0.253609
FTH1	T follicular helper cell	0.0635897	0.503413
FTH1	Type 1 T helper cell	0.0371331	0.696185
FTH1	Type 17 T helper cell	0.0282737	0.766259
FTH1	Type 2 T helper cell	0.225263	0.0164457	*
ACSL3	Activated B cell	-0.123943	0.190896
ACSL3	Activated CD4 T cell	-0.222165	0.0180291	*
ACSL3	Activated CD8 T cell	-0.167743	0.0757474
ACSL3	Activated dendritic cell	-0.0809174	0.394215
ACSL3	CD56bright natural killer cell	-0.0515125	0.587917
ACSL3	CD56dim natural killer cell	-0.186451	0.048003	*
ACSL3	Eosinophil	-0.0336352	0.723585
ACSL3	Gamma delta T cell	0.125889	0.183969
ACSL3	Immature B cell	-0.124868	0.187581
ACSL3	Immature dendritic cell	0.138023	0.144873
ACSL3	Macrophage	0.0191951	0.840076
ACSL3	Mast cell	0.130441	0.168488
ACSL3	MDSC	-0.0886513	0.350439
ACSL3	Monocyte	0.016732	0.860374
ACSL3	Natural killer cell	0.143267	0.130068
ACSL3	Natural killer T cell	-0.0152939	0.872268
ACSL3	Neutrophil	0.160572	0.0893253
ACSL3	Plasmacytoid dendritic cell	0.183534	0.0516712
ACSL3	Regulatory T cell	-0.0560612	0.55534
ACSL3	T follicular helper cell	0.0684633	0.4712
ACSL3	Type 1 T helper cell	-0.0543474	0.567512
ACSL3	Type 17 T helper cell	0.178399	0.0586883
ACSL3	Type 2 T helper cell	0.0747403	0.431418
AIFM2	Activated B cell	-0.0433687	0.648315
AIFM2	Activated CD4 T cell	-0.0111106	0.907021
AIFM2	Activated CD8 T cell	-0.0504218	0.595856
AIFM2	Activated dendritic cell	0.0442392	0.641739
AIFM2	CD56bright natural killer cell	-0.00938767	0.921388
AIFM2	CD56dim natural killer cell	0.226529	0.0158344	*
AIFM2	Eosinophil	-0.0862237	0.36384
AIFM2	Gamma delta T cell	0.0401515	0.672849
AIFM2	Immature B cell	-0.0486806	0.608629
AIFM2	Immature dendritic cell	-0.077416	0.415062
AIFM2	Macrophage	-0.0387309	0.683795
AIFM2	Mast cell	0.0205065	0.829311
AIFM2	MDSC	-0.0224305	0.813574
AIFM2	Monocyte	-0.0121587	0.898295
AIFM2	Natural killer cell	-0.0640802	0.50012
AIFM2	Natural killer T cell	0.0968207	0.307646
AIFM2	Neutrophil	0.0300904	0.751713
AIFM2	Plasmacytoid dendritic cell	-0.0453075	0.633707
AIFM2	Regulatory T cell	0.0141794	0.881506
AIFM2	T follicular helper cell	-0.0589911	0.534828
AIFM2	Type 1 T helper cell	0.0184451	0.846246
AIFM2	Type 17 T helper cell	0.144466	0.126851
AIFM2	Type 2 T helper cell	0.0820678	0.387505
AKR1C1	Activated B cell	0.00973497	0.91849
AKR1C1	Activated CD4 T cell	-0.204688	0.0296487	*
AKR1C1	Activated CD8 T cell	-0.0751161	0.429099
AKR1C1	Activated dendritic cell	-0.0534203	0.574148
AKR1C1	CD56bright natural killer cell	-0.0266583	0.779262
AKR1C1	CD56dim natural killer cell	0.0886875	0.350241
AKR1C1	Eosinophil	-0.12308	0.194028
AKR1C1	Gamma delta T cell	-0.137379	0.146777
AKR1C1	Immature B cell	-0.0375662	0.692818
AKR1C1	Immature dendritic cell	0.021908	0.81784
AKR1C1	Macrophage	-0.138876	0.142381
AKR1C1	Mast cell	-0.00605402	0.949257
AKR1C1	MDSC	-0.119724	0.206558
AKR1C1	Monocyte	-0.124099	0.190333
AKR1C1	Natural killer cell	-0.191449	0.0422209	*
AKR1C1	Natural killer T cell	-0.234253	0.0125141	*
AKR1C1	Neutrophil	-0.085781	0.366318
AKR1C1	Plasmacytoid dendritic cell	-0.0850187	0.370608
AKR1C1	Regulatory T cell	-0.188331	0.0457552	*
AKR1C1	T follicular helper cell	-0.125739	0.184497
AKR1C1	Type 1 T helper cell	-0.128462	0.175095
AKR1C1	Type 17 T helper cell	-0.198708	0.0348669	*
AKR1C1	Type 2 T helper cell	-0.10697	0.259445
AKR1C2	Activated B cell	-0.00813585	0.931844
AKR1C2	Activated CD4 T cell	-0.257621	0.00587362	**
AKR1C2	Activated CD8 T cell	-0.121336	0.200469
AKR1C2	Activated dendritic cell	-0.0897103	0.344691
AKR1C2	CD56bright natural killer cell	0.0242463	0.79879
AKR1C2	CD56dim natural killer cell	0.0434177	0.647944
AKR1C2	Eosinophil	-0.112017	0.237507
AKR1C2	Gamma delta T cell	-0.108172	0.254098
AKR1C2	Immature B cell	-0.0466973	0.623322
AKR1C2	Immature dendritic cell	0.146592	0.121299
AKR1C2	Macrophage	-0.169895	0.0720141
AKR1C2	Mast cell	0.0131627	0.889947
AKR1C2	MDSC	-0.137529	0.146333
AKR1C2	Monocyte	-0.124598	0.188544
AKR1C2	Natural killer cell	-0.199061	0.0345386	*
AKR1C2	Natural killer T cell	-0.198955	0.0346373	*
AKR1C2	Neutrophil	0.0315581	0.740026
AKR1C2	Plasmacytoid dendritic cell	-0.0263395	0.781836
AKR1C2	Regulatory T cell	-0.191693	0.0419543	*
AKR1C2	T follicular helper cell	-0.11126	0.240711
AKR1C2	Type 1 T helper cell	-0.187941	0.0462146	*
AKR1C2	Type 17 T helper cell	-0.15977	0.0909568
AKR1C2	Type 2 T helper cell	-0.223289	0.0174397	*
AKR1C3	Activated B cell	0.342756	0.000202192	**
AKR1C3	Activated CD4 T cell	-0.0929114	0.327679
AKR1C3	Activated CD8 T cell	0.15016	0.112401
AKR1C3	Activated dendritic cell	0.149165	0.114831
AKR1C3	CD56bright natural killer cell	0.134959	0.154095
AKR1C3	CD56dim natural killer cell	0.0308937	0.74531
AKR1C3	Eosinophil	0.267527	0.00417477	**
AKR1C3	Gamma delta T cell	-0.0238279	0.80219
AKR1C3	Immature B cell	0.301494	0.00117391	**
AKR1C3	Immature dendritic cell	0.47945	7.75761e-08	**
AKR1C3	Macrophage	0.0313411	0.741749
AKR1C3	Mast cell	0.144012	0.128062
AKR1C3	MDSC	0.123389	0.192904
AKR1C3	Monocyte	0.207699	0.0272822	*
AKR1C3	Natural killer cell	0.0508797	0.592517
AKR1C3	Natural killer T cell	-0.115377	0.223639
AKR1C3	Neutrophil	0.0860408	0.364862
AKR1C3	Plasmacytoid dendritic cell	0.314164	0.00070225	**
AKR1C3	Regulatory T cell	0.0313342	0.741804
AKR1C3	T follicular helper cell	0.0784524	0.408826
AKR1C3	Type 1 T helper cell	0.0491923	0.604862
AKR1C3	Type 17 T helper cell	0.0812163	0.392465
AKR1C3	Type 2 T helper cell	-0.385133	2.5293e-05	**
ARNTL	Activated B cell	0.435809	1.40258e-06	**
ARNTL	Activated CD4 T cell	0.401897	1.02307e-05	**
ARNTL	Activated CD8 T cell	0.503058	1.3587e-08	**
ARNTL	Activated dendritic cell	0.439998	1.08065e-06	**
ARNTL	CD56bright natural killer cell	0.277377	0.00293588	**
ARNTL	CD56dim natural killer cell	0.121121	0.201274
ARNTL	Eosinophil	0.492621	2.98317e-08	**
ARNTL	Gamma delta T cell	0.292306	0.00168015	**
ARNTL	Immature B cell	0.490304	3.53962e-08	**
ARNTL	Immature dendritic cell	0.333274	0.000309692	**
ARNTL	Macrophage	0.404271	8.96394e-06	**
ARNTL	Mast cell	0.327979	0.000390653	**
ARNTL	MDSC	0.534204	1.10361e-09	**
ARNTL	Monocyte	0.489442	3.77105e-08	**
ARNTL	Natural killer cell	0.279378	0.00272901	**
ARNTL	Natural killer T cell	0.358299	9.75469e-05	**
ARNTL	Neutrophil	0.108458	0.252841
ARNTL	Plasmacytoid dendritic cell	0.413996	5.16081e-06	**
ARNTL	Regulatory T cell	0.441372	9.91347e-07	**
ARNTL	T follicular helper cell	0.439518	1.11363e-06	**
ARNTL	Type 1 T helper cell	0.438516	1.18559e-06	**
ARNTL	Type 17 T helper cell	0.267351	0.00420073	**
ARNTL	Type 2 T helper cell	-0.0807583	0.395149
ATF4	Activated B cell	-0.260779	0.00527501	**
ATF4	Activated CD4 T cell	0.0383203	0.686971
ATF4	Activated CD8 T cell	-0.119571	0.207144
ATF4	Activated dendritic cell	-0.303385	0.00108881	**
ATF4	CD56bright natural killer cell	-0.219032	0.0197624	*
ATF4	CD56dim natural killer cell	0.0951046	0.31634
ATF4	Eosinophil	-0.242896	0.00953484	**
ATF4	Gamma delta T cell	-0.222754	0.0177183	*
ATF4	Immature B cell	-0.289552	0.00186657	**
ATF4	Immature dendritic cell	-0.29825	0.00133412	**
ATF4	Macrophage	-0.194324	0.0391673	*
ATF4	Mast cell	-0.263177	0.00485761	**
ATF4	MDSC	-0.201864	0.0320238	*
ATF4	Monocyte	-0.327036	0.000406975	**
ATF4	Natural killer cell	-0.279529	0.00271392	**
ATF4	Natural killer T cell	-0.153317	0.104962
ATF4	Neutrophil	-0.129654	0.171093
ATF4	Plasmacytoid dendritic cell	-0.404018	9.09181e-06	**
ATF4	Regulatory T cell	-0.187154	0.0471526	*
ATF4	T follicular helper cell	-0.273878	0.00333193	**
ATF4	Type 1 T helper cell	-0.243564	0.00933307	**
ATF4	Type 17 T helper cell	-0.0378558	0.69057
ATF4	Type 2 T helper cell	0.148419	0.116678
BRD4	Activated B cell	-0.196907	0.0365824	*
BRD4	Activated CD4 T cell	-0.0606245	0.523559
BRD4	Activated CD8 T cell	-0.281049	0.00256647	**
BRD4	Activated dendritic cell	-0.153949	0.10352
BRD4	CD56bright natural killer cell	-0.157112	0.096535
BRD4	CD56dim natural killer cell	-0.033863	0.721789
BRD4	Eosinophil	-0.157892	0.0948711
BRD4	Gamma delta T cell	-0.145486	0.124161
BRD4	Immature B cell	-0.175628	0.0627882
BRD4	Immature dendritic cell	-0.200847	0.0329179	*
BRD4	Macrophage	-0.175523	0.0629493
BRD4	Mast cell	0.0165332	0.862016
BRD4	MDSC	-0.218818	0.0198855	*
BRD4	Monocyte	-0.131404	0.16534
BRD4	Natural killer cell	-0.171752	0.0689126
BRD4	Natural killer T cell	-0.0689218	0.468228
BRD4	Neutrophil	0.0238696	0.801852
BRD4	Plasmacytoid dendritic cell	0.0129015	0.892117
BRD4	Regulatory T cell	-0.170671	0.0707047
BRD4	T follicular helper cell	-0.14783	0.118151
BRD4	Type 1 T helper cell	-0.142007	0.133514
BRD4	Type 17 T helper cell	0.00436509	0.963401
BRD4	Type 2 T helper cell	0.171185	0.0698483
CA9	Activated B cell	-0.383394	2.77058e-05	**
CA9	Activated CD4 T cell	-0.196906	0.0365839	*
CA9	Activated CD8 T cell	-0.264473	0.00464448	**
CA9	Activated dendritic cell	-0.208102	0.0269782	*
CA9	CD56bright natural killer cell	-0.00146435	0.987718
CA9	CD56dim natural killer cell	-0.00429737	0.963969
CA9	Eosinophil	-0.394267	1.55408e-05	**
CA9	Gamma delta T cell	-0.103055	0.277387
CA9	Immature B cell	-0.3981	1.26133e-05	**
CA9	Immature dendritic cell	-0.325949	0.000426559	**
CA9	Macrophage	-0.319249	0.000567729	**
CA9	Mast cell	-0.338712	0.000242919	**
CA9	MDSC	-0.286035	0.00213183	**
CA9	Monocyte	-0.378851	3.5065e-05	**
CA9	Natural killer cell	-0.171956	0.0685785
CA9	Natural killer T cell	-0.0579389	0.542151
CA9	Neutrophil	-0.179695	0.0568481
CA9	Plasmacytoid dendritic cell	-0.252747	0.00691598	**
CA9	Regulatory T cell	-0.219758	0.0193484	*
CA9	T follicular helper cell	-0.271811	0.00358779	**
CA9	Type 1 T helper cell	-0.22751	0.0153741	*
CA9	Type 17 T helper cell	-0.0563062	0.55361
CA9	Type 2 T helper cell	0.206202	0.0284383	*
CAV1	Activated B cell	-0.142592	0.131905
CAV1	Activated CD4 T cell	0.0627724	0.508925
CAV1	Activated CD8 T cell	0.147658	0.118584
CAV1	Activated dendritic cell	0.22771	0.0152818	*
CAV1	CD56bright natural killer cell	0.205533	0.0289678	*
CAV1	CD56dim natural killer cell	0.148228	0.117153
CAV1	Eosinophil	-0.0305334	0.74818
CAV1	Gamma delta T cell	0.337433	0.000257298	**
CAV1	Immature B cell	-0.102187	0.281475
CAV1	Immature dendritic cell	0.0658543	0.488303
CAV1	Macrophage	0.27039	0.00377366	**
CAV1	Mast cell	0.129897	0.170285
CAV1	MDSC	0.219449	0.0195236	*
CAV1	Monocyte	-0.035301	0.71049
CAV1	Natural killer cell	0.35581	0.000109905	**
CAV1	Natural killer T cell	0.391101	1.84284e-05	**
CAV1	Neutrophil	0.210229	0.0254202	*
CAV1	Plasmacytoid dendritic cell	0.169539	0.0726207
CAV1	Regulatory T cell	0.272228	0.00353478	**
CAV1	T follicular helper cell	0.229757	0.0143638	*
CAV1	Type 1 T helper cell	0.313261	0.000728985	**
CAV1	Type 17 T helper cell	0.25188	0.00711768	**
CAV1	Type 2 T helper cell	0.329494	0.000365687	**
CBS	Activated B cell	-0.285199	0.0021997	**
CBS	Activated CD4 T cell	-0.119117	0.208886
CBS	Activated CD8 T cell	-0.234491	0.0124223	*
CBS	Activated dendritic cell	-0.245437	0.00878721	**
CBS	CD56bright natural killer cell	-0.232155	0.0133496	*
CBS	CD56dim natural killer cell	0.111311	0.240495
CBS	Eosinophil	-0.237554	0.011292	*
CBS	Gamma delta T cell	-0.172492	0.0677071
CBS	Immature B cell	-0.318039	0.000597398	**
CBS	Immature dendritic cell	-0.318364	0.000589284	**
CBS	Macrophage	-0.204527	0.0297797	*
CBS	Mast cell	-0.212983	0.0235175	*
CBS	MDSC	-0.264184	0.00469123	**
CBS	Monocyte	-0.229342	0.014546	*
CBS	Natural killer cell	-0.234503	0.0124174	*
CBS	Natural killer T cell	-0.119349	0.207995
CBS	Neutrophil	-0.194756	0.0387247	*
CBS	Plasmacytoid dendritic cell	-0.326964	0.000408233	**
CBS	Regulatory T cell	-0.208372	0.0267759	*
CBS	T follicular helper cell	-0.323634	0.000471185	**
CBS	Type 1 T helper cell	-0.249314	0.00774543	**
CBS	Type 17 T helper cell	0.017513	0.853927
CBS	Type 2 T helper cell	0.122531	0.19604
CD44	Activated B cell	-0.126562	0.181617
CD44	Activated CD4 T cell	-0.0880133	0.353931
CD44	Activated CD8 T cell	-0.195647	0.0378252	*
CD44	Activated dendritic cell	0.0379117	0.690137
CD44	CD56bright natural killer cell	0.111385	0.240182
CD44	CD56dim natural killer cell	-0.138347	0.143923
CD44	Eosinophil	-0.0858221	0.366087
CD44	Gamma delta T cell	0.140893	0.136619
CD44	Immature B cell	-0.123643	0.19198
CD44	Immature dendritic cell	-0.115411	0.223502
CD44	Macrophage	0.163394	0.0837674
CD44	Mast cell	0.0894486	0.346106
CD44	MDSC	-0.0173213	0.855509
CD44	Monocyte	-0.0448249	0.637331
CD44	Natural killer cell	0.183557	0.0516419
CD44	Natural killer T cell	0.178994	0.0578382
CD44	Neutrophil	0.172173	0.0682249
CD44	Plasmacytoid dendritic cell	0.0960388	0.311587
CD44	Regulatory T cell	0.0586531	0.537175
CD44	T follicular helper cell	0.117988	0.213266
CD44	Type 1 T helper cell	0.171197	0.0698287
CD44	Type 17 T helper cell	-0.0250971	0.791887
CD44	Type 2 T helper cell	0.364677	7.15355e-05	**
CDKN1A	Activated B cell	-0.185106	0.0496673	*
CDKN1A	Activated CD4 T cell	0.0446772	0.638441
CDKN1A	Activated CD8 T cell	0.00385739	0.967656
CDKN1A	Activated dendritic cell	0.0853257	0.368877
CDKN1A	CD56bright natural killer cell	0.251113	0.00730058	**
CDKN1A	CD56dim natural killer cell	0.332705	0.000317586	**
CDKN1A	Eosinophil	-0.135198	0.153361
CDKN1A	Gamma delta T cell	0.0744567	0.433173
CDKN1A	Immature B cell	-0.15942	0.0916773
CDKN1A	Immature dendritic cell	0.00375294	0.968531
CDKN1A	Macrophage	0.0840915	0.375868
CDKN1A	Mast cell	0.168646	0.0741615
CDKN1A	MDSC	0.118846	0.209933
CDKN1A	Monocyte	-0.121242	0.200823
CDKN1A	Natural killer cell	0.0987804	0.297911
CDKN1A	Natural killer T cell	0.226138	0.016021	*
CDKN1A	Neutrophil	0.240752	0.0102088	*
CDKN1A	Plasmacytoid dendritic cell	0.0151262	0.873657
CDKN1A	Regulatory T cell	0.160106	0.0902703
CDKN1A	T follicular helper cell	0.12966	0.171073
CDKN1A	Type 1 T helper cell	0.0868245	0.360494
CDKN1A	Type 17 T helper cell	0.197758	0.0357633	*
CDKN1A	Type 2 T helper cell	0.215471	0.0219048	*
CHMP5	Activated B cell	0.352181	0.000130548	**
CHMP5	Activated CD4 T cell	0.331628	0.000333024	**
CHMP5	Activated CD8 T cell	0.474772	1.07895e-07	**
CHMP5	Activated dendritic cell	0.323309	0.000477795	**
CHMP5	CD56bright natural killer cell	0.216719	0.021132	*
CHMP5	CD56dim natural killer cell	0.0297958	0.754067
CHMP5	Eosinophil	0.453416	4.57755e-07	**
CHMP5	Gamma delta T cell	0.363265	7.66625e-05	**
CHMP5	Immature B cell	0.404978	8.6163e-06	**
CHMP5	Immature dendritic cell	0.439484	1.11598e-06	**
CHMP5	Macrophage	0.37454	4.37107e-05	**
CHMP5	Mast cell	0.397352	1.31399e-05	**
CHMP5	MDSC	0.48768	4.28984e-08	**
CHMP5	Monocyte	0.380342	3.24695e-05	**
CHMP5	Natural killer cell	0.354724	0.000115739	**
CHMP5	Natural killer T cell	0.312202	0.000761552	**
CHMP5	Neutrophil	0.254726	0.00647452	**
CHMP5	Plasmacytoid dendritic cell	0.328598	0.00038027	**
CHMP5	Regulatory T cell	0.392176	1.73958e-05	**
CHMP5	T follicular helper cell	0.431749	1.79992e-06	**
CHMP5	Type 1 T helper cell	0.321698	0.000511776	**
CHMP5	Type 17 T helper cell	0.238204	0.011064	*
CHMP5	Type 2 T helper cell	-0.216114	0.0215041	*
CHMP6	Activated B cell	-0.146487	0.121568
CHMP6	Activated CD4 T cell	-0.197154	0.0363437	*
CHMP6	Activated CD8 T cell	-0.201784	0.0320939	*
CHMP6	Activated dendritic cell	-0.203171	0.0309056	*
CHMP6	CD56bright natural killer cell	-0.109329	0.249027
CHMP6	CD56dim natural killer cell	-0.167271	0.0765868
CHMP6	Eosinophil	-0.12786	0.177144
CHMP6	Gamma delta T cell	-0.0179446	0.850369
CHMP6	Immature B cell	-0.172132	0.0682917
CHMP6	Immature dendritic cell	-0.122195	0.197278
CHMP6	Macrophage	-0.0277268	0.770655
CHMP6	Mast cell	-0.10461	0.270163
CHMP6	MDSC	-0.163238	0.0840669
CHMP6	Monocyte	-0.101545	0.284529
CHMP6	Natural killer cell	-0.04096	0.66665
CHMP6	Natural killer T cell	-0.128723	0.174215
CHMP6	Neutrophil	0.00410773	0.965558
CHMP6	Plasmacytoid dendritic cell	-0.159639	0.0912252
CHMP6	Regulatory T cell	-0.184172	0.0508501
CHMP6	T follicular helper cell	-0.0942276	0.320843
CHMP6	Type 1 T helper cell	-0.181841	0.0539046
CHMP6	Type 17 T helper cell	-0.104485	0.270741
CHMP6	Type 2 T helper cell	0.121323	0.20052
CISD1	Activated B cell	0.175094	0.0636049
CISD1	Activated CD4 T cell	0.161246	0.0879711
CISD1	Activated CD8 T cell	0.171772	0.0688798
CISD1	Activated dendritic cell	0.116141	0.220568
CISD1	CD56bright natural killer cell	0.0315586	0.740021
CISD1	CD56dim natural killer cell	0.0521204	0.583514
CISD1	Eosinophil	0.121881	0.198442
CISD1	Gamma delta T cell	0.0210445	0.824903
CISD1	Immature B cell	0.168905	0.0737131
CISD1	Immature dendritic cell	0.0772526	0.41605
CISD1	Macrophage	0.0493974	0.603356
CISD1	Mast cell	0.0649263	0.494466
CISD1	MDSC	0.0679064	0.474823
CISD1	Monocyte	0.117626	0.214682
CISD1	Natural killer cell	-0.0826611	0.38407
CISD1	Natural killer T cell	-0.0397589	0.675867
CISD1	Neutrophil	-0.0178121	0.851461
CISD1	Plasmacytoid dendritic cell	-0.014327	0.880281
CISD1	Regulatory T cell	0.073824	0.437102
CISD1	T follicular helper cell	-0.0102748	0.913987
CISD1	Type 1 T helper cell	-0.0136242	0.886113
CISD1	Type 17 T helper cell	0.180017	0.0563978
CISD1	Type 2 T helper cell	-0.113677	0.230582
CISD2	Activated B cell	-0.301981	0.00115141	**
CISD2	Activated CD4 T cell	-0.0185777	0.845154
CISD2	Activated CD8 T cell	-0.085692	0.366817
CISD2	Activated dendritic cell	-0.189025	0.0449481	*
CISD2	CD56bright natural killer cell	-0.236748	0.0115802	*
CISD2	CD56dim natural killer cell	0.00129751	0.989118
CISD2	Eosinophil	-0.29251	0.00166703	**
CISD2	Gamma delta T cell	-0.100867	0.287771
CISD2	Immature B cell	-0.31654	0.000636124	**
CISD2	Immature dendritic cell	-0.262821	0.00491758	**
CISD2	Macrophage	-0.241941	0.0098302	**
CISD2	Mast cell	-0.165152	0.0804474
CISD2	MDSC	-0.219579	0.0194497	*
CISD2	Monocyte	-0.285586	0.00216802	**
CISD2	Natural killer cell	-0.224706	0.0167212	*
CISD2	Natural killer T cell	-0.0372854	0.695
CISD2	Neutrophil	-0.18194	0.0537716
CISD2	Plasmacytoid dendritic cell	-0.371448	5.10975e-05	**
CISD2	Regulatory T cell	-0.22576	0.0162032	*
CISD2	T follicular helper cell	-0.192587	0.0409896	*
CISD2	Type 1 T helper cell	-0.200432	0.033289	*
CISD2	Type 17 T helper cell	-0.0139366	0.88352
CISD2	Type 2 T helper cell	0.193487	0.0400362	*
FADS2	Activated B cell	-0.191891	0.0417387	*
FADS2	Activated CD4 T cell	-0.226075	0.0160512	*
FADS2	Activated CD8 T cell	-0.240897	0.0101621	*
FADS2	Activated dendritic cell	0.0217231	0.819351
FADS2	CD56bright natural killer cell	0.222561	0.0178197	*
FADS2	CD56dim natural killer cell	0.137265	0.147115
FADS2	Eosinophil	-0.21299	0.0235132	*
FADS2	Gamma delta T cell	-0.214083	0.0227927	*
FADS2	Immature B cell	-0.219527	0.0194793	*
FADS2	Immature dendritic cell	-0.223008	0.0175858	*
FADS2	Macrophage	-0.110387	0.244446
FADS2	Mast cell	-0.0957345	0.31313
FADS2	MDSC	-0.176094	0.0620839
FADS2	Monocyte	-0.141754	0.134214
FADS2	Natural killer cell	-0.117472	0.215288
FADS2	Natural killer T cell	0.118024	0.213124
FADS2	Neutrophil	-0.0593007	0.532683
FADS2	Plasmacytoid dendritic cell	-0.0465795	0.624199
FADS2	Regulatory T cell	-0.0468875	0.621906
FADS2	T follicular helper cell	-0.190273	0.0435267	*
FADS2	Type 1 T helper cell	-0.0208508	0.826489
FADS2	Type 17 T helper cell	-0.00964943	0.919204
FADS2	Type 2 T helper cell	0.173108	0.0667169
FH	Activated B cell	-0.279564	0.00271047	**
FH	Activated CD4 T cell	0.102315	0.28087
FH	Activated CD8 T cell	-0.032831	0.729936
FH	Activated dendritic cell	-0.18984	0.0440161	*
FH	CD56bright natural killer cell	-0.0193874	0.838495
FH	CD56dim natural killer cell	-0.0983927	0.299821
FH	Eosinophil	-0.233926	0.0126411	*
FH	Gamma delta T cell	0.105888	0.264322
FH	Immature B cell	-0.262584	0.00495797	**
FH	Immature dendritic cell	-0.207727	0.0272611	*
FH	Macrophage	-0.148986	0.11527
FH	Mast cell	-0.213518	0.0231622	*
FH	MDSC	-0.10284	0.278399
FH	Monocyte	-0.236758	0.0115765	*
FH	Natural killer cell	-0.0561214	0.554915
FH	Natural killer T cell	-0.0628575	0.50835
FH	Neutrophil	-0.0651888	0.492718
FH	Plasmacytoid dendritic cell	-0.250388	0.0074771	**
FH	Regulatory T cell	-0.08612	0.364419
FH	T follicular helper cell	-0.148478	0.116529
FH	Type 1 T helper cell	-0.134354	0.155967
FH	Type 17 T helper cell	-0.0360969	0.704263
FH	Type 2 T helper cell	0.252619	0.00694533	**
GCH1	Activated B cell	0.526268	2.1437e-09	**
GCH1	Activated CD4 T cell	0.607934	9.27724e-13	**
GCH1	Activated CD8 T cell	0.676258	2.04509e-16	**
GCH1	Activated dendritic cell	0.575969	2.4827e-11	**
GCH1	CD56bright natural killer cell	0.138022	0.144877
GCH1	CD56dim natural killer cell	0.241984	0.00981664	**
GCH1	Eosinophil	0.586987	8.32627e-12	**
GCH1	Gamma delta T cell	0.504622	1.20485e-08	**
GCH1	Immature B cell	0.605461	1.21224e-12	**
GCH1	Immature dendritic cell	0.493338	2.82851e-08	**
GCH1	Macrophage	0.567211	5.75038e-11	**
GCH1	Mast cell	0.535595	9.80611e-10	**
GCH1	MDSC	0.702824	4.07147e-18	**
GCH1	Monocyte	0.637021	3.32756e-14	**
GCH1	Natural killer cell	0.447151	6.86765e-07	**
GCH1	Natural killer T cell	0.46455	2.18151e-07	**
GCH1	Neutrophil	0.34063	0.000222736	**
GCH1	Plasmacytoid dendritic cell	0.440682	1.03525e-06	**
GCH1	Regulatory T cell	0.654392	3.8307e-15	**
GCH1	T follicular helper cell	0.569072	4.82044e-11	**
GCH1	Type 1 T helper cell	0.505777	1.10209e-08	**
GCH1	Type 17 T helper cell	0.534867	1.0433e-09	**
GCH1	Type 2 T helper cell	-0.139774	0.139794
GPX4	Activated B cell	-0.306771	0.00095035	**
GPX4	Activated CD4 T cell	-0.041996	0.658739
GPX4	Activated CD8 T cell	-0.0950252	0.316746
GPX4	Activated dendritic cell	-0.233266	0.0129014	*
GPX4	CD56bright natural killer cell	-0.0693929	0.465185
GPX4	CD56dim natural killer cell	0.129382	0.172
GPX4	Eosinophil	-0.316532	0.000636334	**
GPX4	Gamma delta T cell	-0.173435	0.0661967
GPX4	Immature B cell	-0.312449	0.000753828	**
GPX4	Immature dendritic cell	-0.339741	0.000231895	**
GPX4	Macrophage	-0.170593	0.0708353
GPX4	Mast cell	-0.324622	0.000451634	**
GPX4	MDSC	-0.164219	0.0821955
GPX4	Monocyte	-0.315949	0.000652011	**
GPX4	Natural killer cell	-0.244664	0.00900895	**
GPX4	Natural killer T cell	-0.127253	0.179224
GPX4	Neutrophil	-0.208899	0.0263849	*
GPX4	Plasmacytoid dendritic cell	-0.389852	1.97008e-05	**
GPX4	Regulatory T cell	-0.12781	0.177313
GPX4	T follicular helper cell	-0.283895	0.00230948	**
GPX4	Type 1 T helper cell	-0.205185	0.0292467	*
GPX4	Type 17 T helper cell	-0.100352	0.290253
GPX4	Type 2 T helper cell	0.186473	0.0479765	*
HELLS	Activated B cell	-0.0960414	0.311574
HELLS	Activated CD4 T cell	0.345063	0.000181891	**
HELLS	Activated CD8 T cell	0.0568753	0.549603
HELLS	Activated dendritic cell	-0.053033	0.576931
HELLS	CD56bright natural killer cell	-0.16026	0.0899562
HELLS	CD56dim natural killer cell	0.191712	0.0419343	*
HELLS	Eosinophil	-0.125352	0.185863
HELLS	Gamma delta T cell	-0.193837	0.0396711	*
HELLS	Immature B cell	-0.0689342	0.468148
HELLS	Immature dendritic cell	-0.260112	0.00539675	**
HELLS	Macrophage	-0.0977706	0.302902
HELLS	Mast cell	-0.135173	0.153437
HELLS	MDSC	-0.0234528	0.805242
HELLS	Monocyte	-0.0715493	0.451396
HELLS	Natural killer cell	-0.284555	0.0022533	**
HELLS	Natural killer T cell	-0.0329302	0.729151
HELLS	Neutrophil	-0.157205	0.096334
HELLS	Plasmacytoid dendritic cell	-0.323892	0.000466018	**
HELLS	Regulatory T cell	0.0324739	0.732762
HELLS	T follicular helper cell	-0.15998	0.0905269
HELLS	Type 1 T helper cell	-0.135126	0.153581
HELLS	Type 17 T helper cell	0.103375	0.275889
HELLS	Type 2 T helper cell	0.170757	0.0705609
HIF1A	Activated B cell	0.299062	0.00129222	**
HIF1A	Activated CD4 T cell	0.328808	0.000376814	**
HIF1A	Activated CD8 T cell	0.236989	0.0114933	*
HIF1A	Activated dendritic cell	0.405578	8.33149e-06	**
HIF1A	CD56bright natural killer cell	0.29373	0.00159053	**
HIF1A	CD56dim natural killer cell	0.0356615	0.707667
HIF1A	Eosinophil	0.354256	0.000118339	**
HIF1A	Gamma delta T cell	0.453566	4.53284e-07	**
HIF1A	Immature B cell	0.352665	0.0001276	**
HIF1A	Immature dendritic cell	0.327707	0.000395295	**
HIF1A	Macrophage	0.374579	4.36243e-05	**
HIF1A	Mast cell	0.493869	2.71915e-08	**
HIF1A	MDSC	0.407309	7.55771e-06	**
HIF1A	Monocyte	0.429285	2.09076e-06	**
HIF1A	Natural killer cell	0.487224	4.43454e-08	**
HIF1A	Natural killer T cell	0.502865	1.37892e-08	**
HIF1A	Neutrophil	0.447252	6.82312e-07	**
HIF1A	Plasmacytoid dendritic cell	0.525142	2.35216e-09	**
HIF1A	Regulatory T cell	0.445999	7.39271e-07	**
HIF1A	T follicular helper cell	0.5456	4.12587e-10	**
[truncated: 601 more rows]
